# Supplementary material
Source: HighWire-hosted journal article supplement (doi:10.1101/rna.079917.123)
Supplement: Supplemental_Figure_Legends.docx [file Supplemental_Figure_Legends.docx]

**Supplementary Figure 1. Human U1C and Luc7Ls are expressed at similar or higher level than their yeast counterparts in the U1C (A) or Luc7 (B) shuffle strain.** Flag-tagged yeast and human U1C, as well as yeast Luc7 and human Luc7Ls (all under GPD promoter and without codon optimization for yeast) were transformed into the U1C or Luc7 shuffle strain. The amount of protein expressed was detected by anti-Flag Western blot from whole cell lysate. G6PD serves as an internal control. For some reason, Flag-tagged yeast U1C was not detected well so increased amounts of cell lysate were loaded to detect and confirm the faint band as yU1C.

**Supplementary Figure 2. Structural analyses of the U1 snRNP h-yU1C. (A)** The gold-standard FSC curve of the final reconstruction indicates a numerical resolution of 3.5 Å. **(B)** Representative density (mesh) of the ZnF domain of h-yU1C showing well-defined main chain density and side chain directions (some side chain density is not visible which is often the case for amino acids with flexible side chains). (**C**) Density (mesh) of the region around residues 3 and 4 (stick model) in the cryo-EM structure of yeast U1 snRNP (Li et al. 2019) and U1 snRNP h-yU1C. **(D)** Cryo-EM density map (mesh) surrounding the N-terminal helix of Luc7 (backbone model in sticks) is well defined in the U1 snRNP h-yU1C structure.

**Supplementary Figure 3.** **U1 snRNP h-yU1C and U1 snRNP WT bind to the Ubc9 5’ ss with similar affinities as determined by FP experiments.** The Ubc9 oligo sequence was AAGAAAG/GUAAGUAG where / denotes the exon/intron boundary. The control oligo was the 5’ end of U1 snRNA with the sequence AUACUUACCU. FP values were baseline (oligo alone) subtracted to better align and compare the two binding curves.

**Supplementary Figure 4. The U1C T17S/K28R double mutant is not sufficient to account for the growth and splicing defect of the h-yU1C strain**. (A) Spot assay of WT, h-yU1C and T17S/K28R at different temperatures. (B) RT-PCR of POP9 and QCR9 showed that their splicing was not negatively impacted by the T17S/K28R mutant.

**Supplementary Figure 5.** **Mitochondrial inhibitors affect the uninduced Luc7D strain much more drastically than the induced.** Growth curve of the Luc7D strain in the presence of Antimycin (10M) and Oligomycin A (50M), two mitochondrial inhibitors which inhibit electron transport and ATP synthase, respectively.
