# Supplementary material
Source: HighWire-hosted journal article supplement (doi:10.1101/rna.079917.123)
Supplement: Supplemental_Table_1_h-yU1C_vs_WT.xlsx [file Supplemental_Table_1_h-yU1C_vs_WT.xlsx]

## Sheet: Sheet1
event_id	gene_id	h-yU1C_rep1	h-yU1C_rep2	h-yU1C_rep3	WT_rep1	WT_rep2	WT_rep3	max.h-yU1C	min.h-yU1C	max.wt	min.wt	meanIR.h-yU1C	meanIR.wt	spanIR.h-yU1C	spanpsi.wt	deltaIR	t_test_p	FDR
RI.0000138	QCR10	0.7092	0.6641	0.6808	0.2074	0.2602	0.1972	0.7092	0.6641	0.2602	0.1972	0.7092	0.2074	0.0451	0.063	0.502	0.000103	0.000783
RI.0000081	QCR9	0.8121	0.7703	0.7622	0.3807	0.5949	0.4921	0.8121	0.7622	0.5949	0.3807	0.8121	0.3807	0.0499	0.2142	0.431	0.0354	0.042
RI.0000100	UBC9	0.7428	0.7463	0.7202	0.3569	0.375	0.3706	0.7463	0.7202	0.375	0.3569	0.7428	0.3569	0.0261	0.0181	0.386	1.14e-05	0.000309
RI.0000005	POP8	0.485	0.5025	0.435	0.1241	0.1538	0.1173	0.5025	0.435	0.1538	0.1173	0.485	0.1241	0.0675	0.0365	0.361	0.000537	0.00215
RI.0000247	PRE3	0.4926	0.4536	0.4564	0.1422	0.115	0.1305	0.4926	0.4536	0.1422	0.115	0.4926	0.1422	0.039	0.0272	0.35	8.34e-05	0.000733
RI.0000062	SRC1	0.824	0.8577	0.7799	0.4803	0.4203	0.4946	0.8577	0.7799	0.4946	0.4203	0.824	0.4803	0.0778	0.0743	0.344	0.000375	0.00166
RI.0000212	TUB3	0.6563	0.6111	0.6009	0.3275	0.4124	0.3625	0.6563	0.6009	0.4124	0.3275	0.6563	0.3275	0.0554	0.0849	0.329	0.00172	0.00426
RI.0000091	RPL35B	0.385	0.3713	0.3548	0.0706	0.0633	0.0519	0.385	0.3548	0.0706	0.0519	0.385	0.0706	0.0302	0.0187	0.314	3.44e-05	0.000467
RI.0000001	MRPL44	0.7628	0.7257	0.8146	0.4564	0.3488	0.4747	0.8146	0.7257	0.4747	0.3488	0.7628	0.4564	0.0889	0.1259	0.306	0.0033	0.00627
RI.0000093	ARP9	0.5028	0.3941	0.3184	0.1983	0.1009	0.1748	0.5028	0.3184	0.1983	0.1009	0.5028	0.1983	0.1844	0.0974	0.304	0.0255	0.0313
RI.0000197	RPS27A	0.807	0.7998	0.8167	0.5212	0.5353	0.6014	0.8167	0.7998	0.6014	0.5212	0.807	0.5212	0.0169	0.0802	0.286	0.00742	0.0112
RI.0000192	YHR097C	0.5157	0.5422	0.5278	0.2339	0.2481	0.2423	0.5422	0.5157	0.2481	0.2339	0.5157	0.2339	0.0265	0.0142	0.282	5.12e-05	0.000608
RI.0000054	RPL7A	0.9236	0.9115	0.898	0.6538	0.5971	0.5615	0.9236	0.898	0.6538	0.5615	0.9236	0.6538	0.0256	0.0923	0.27	0.00486	0.00824
RI.0000221	RPS22B	0.4761	0.4421	0.4951	0.2087	0.2073	0.1959	0.4951	0.4421	0.2087	0.1959	0.4761	0.2087	0.053	0.0128	0.267	0.00201	0.00459
RI.0000239	SAC6	0.4578	0.4453	0.4543	0.2	0.1456	0.1127	0.4578	0.4453	0.2	0.1127	0.4578	0.2	0.0125	0.0873	0.258	0.00625	0.00973
RI.0000064	RPS25B	0.4473	0.4319	0.4516	0.1901	0.2439	0.2416	0.4516	0.4319	0.2439	0.1901	0.4473	0.1901	0.0197	0.0538	0.257	0.00319	0.00616
RI.0000145	RPS30B	0.8021	0.79	0.7671	0.5527	0.5628	0.5032	0.8021	0.7671	0.5628	0.5032	0.8021	0.5527	0.035	0.0596	0.249	0.00109	0.00319
RI.0000282	RPS17A	0.3722	0.3311	0.3337	0.1272	0.113	0.1238	0.3722	0.3311	0.1272	0.113	0.3722	0.1272	0.0411	0.0142	0.245	0.00165	0.00424
RI.0000331	UBC5	0.4341	0.3725	0.4909	0.1888	0.2434	0.2651	0.4909	0.3725	0.2651	0.1888	0.4341	0.1888	0.1184	0.0763	0.245	0.0116	0.0155
RI.0000137	IMD4	0.3361	0.3125	0.3079	0.1019	0.1178	0.1029	0.3361	0.3079	0.1178	0.1019	0.3361	0.1019	0.0282	0.0159	0.234	0.000146	0.000969
RI.0000122	RPS26A	0.7406	0.7508	0.7978	0.5119	0.469	0.5835	0.7978	0.7406	0.5835	0.469	0.7406	0.5119	0.0572	0.1145	0.229	0.00748	0.0112
RI.0000191	ERV1	0.4725	0.4388	0.459	0.2453	0.2577	0.27	0.4725	0.4388	0.27	0.2453	0.4725	0.2453	0.0337	0.0247	0.227	0.000147	0.000969
RI.0000217	UBC13	0.6519	0.6726	0.6815	0.4246	0.5181	0.4164	0.6815	0.6519	0.5181	0.4164	0.6519	0.4246	0.0296	0.1017	0.227	0.0168	0.0217
RI.0000174	RPL37B	0.4057	0.4365	0.461	0.1816	0.1871	0.204	0.461	0.4057	0.204	0.1816	0.4057	0.1816	0.0553	0.0224	0.224	0.00137	0.00377
RI.0000319	YOS1	0.7073	0.5941	0.6968	0.4859	0.5676	0.585	0.7073	0.5941	0.585	0.4859	0.7073	0.4859	0.1132	0.0991	0.221	0.066	0.0729
RI.0000209	RPS8B	0.3553	0.2947	0.2886	0.1355	0.1242	0.1353	0.3553	0.2886	0.1355	0.1242	0.3553	0.1355	0.0667	0.0113	0.22	0.0116	0.0155
RI.0000188	TAN1	0.4277	0.3632	0.4684	0.2108	0.1607	0.2722	0.4684	0.3632	0.2722	0.1607	0.4277	0.2108	0.1052	0.1115	0.217	0.00999	0.0138
RI.0000243	RFA2	0.3404	0.2781	0.2847	0.124	0.0714	0.0791	0.3404	0.2781	0.124	0.0714	0.3404	0.124	0.0623	0.0526	0.216	0.00141	0.00383
RI.0000156	SEC17	0.3077	0.303	0.3474	0.0926	0.1487	0.167	0.3474	0.303	0.167	0.0926	0.3077	0.0926	0.0444	0.0744	0.215	0.00419	0.00744
RI.0000206	SUS1	0.4419	0.45	0.4759	0.2317	0.2199	0.1824	0.4759	0.4419	0.2317	0.1824	0.4419	0.2317	0.034	0.0493	0.21	0.000348	0.00165
RI.0000173	TMA20	0.3108	0.3213	0.2269	0.1053	0.1187	0.1399	0.3213	0.2269	0.1399	0.1053	0.3108	0.1053	0.0944	0.0346	0.206	0.0221	0.0278
RI.0000056	NCB2	0.5037	0.4954	0.5371	0.3006	0.3084	0.3327	0.5371	0.4954	0.3327	0.3006	0.5037	0.3006	0.0417	0.0321	0.203	0.000364	0.00165
RI.0000178	LSM2	0.3206	0.3266	0.3269	0.1312	0.1563	0.1589	0.3269	0.3206	0.1589	0.1312	0.3206	0.1312	0.0063	0.0277	0.189	0.00162	0.00424
RI.0000200	YCL012C	0.3193	0.3298	0.4892	0.1314	0.277	0.1554	0.4892	0.3193	0.277	0.1314	0.3193	0.1314	0.1699	0.1456	0.188	0.0567	0.0641
RI.0000132	MOB2	0.3855	0.3436	0.3611	0.2	0.1513	0.2048	0.3855	0.3436	0.2048	0.1513	0.3855	0.2	0.0419	0.0535	0.186	0.00164	0.00424
RI.0000297	ARP2	0.4778	0.4754	0.4732	0.2935	0.2727	0.2412	0.4778	0.4732	0.2935	0.2412	0.4778	0.2935	0.0046	0.0523	0.184	0.00511	0.00859
RI.0000335	CNB1	0.2944	0.3155	0.3035	0.1146	0.1611	0.1416	0.3155	0.2944	0.1611	0.1146	0.2944	0.1146	0.0211	0.0465	0.18	0.00213	0.00467
RI.0000144	RPL42A	0.2653	0.2382	0.2374	0.0873	0.0973	0.1002	0.2653	0.2374	0.1002	0.0873	0.2653	0.0873	0.0279	0.0129	0.178	0.00106	0.00319
RI.0000133	RPL13B	0.5596	0.543	0.5486	0.3882	0.3765	0.4127	0.5596	0.543	0.4127	0.3765	0.5596	0.3882	0.0166	0.0362	0.171	0.00125	0.00349
RI.0000041	ERD2	0.295	0.2909	0.3028	0.1265	0.1154	0.1561	0.3028	0.2909	0.1561	0.1154	0.295	0.1265	0.0119	0.0407	0.168	0.00321	0.00616
RI.0000313	RPL36A	0.3225	0.3271	0.3172	0.162	0.1818	0.1546	0.3271	0.3172	0.1818	0.1546	0.3225	0.162	0.0099	0.0272	0.16	0.00104	0.00319
RI.0000076	VMA10	0.4141	0.4502	0.4304	0.2556	0.2218	0.2788	0.4502	0.4141	0.2788	0.2218	0.4141	0.2556	0.0361	0.057	0.159	0.00168	0.00426
RI.0000030	YBR255C-A	0.7424	0.7399	0.7547	0.589	0.5751	0.5896	0.7547	0.7399	0.5896	0.5751	0.7424	0.589	0.0148	0.0145	0.153	1.67e-05	0.000353
RI.0000070	RPS27B	0.2538	0.2447	0.2598	0.103	0.1012	0.1068	0.2598	0.2447	0.1068	0.1012	0.2538	0.103	0.0151	0.0056	0.151	0.000218	0.00115
RI.0000266	VPS29	0.4118	0.3313	0.3043	0.2614	0.168	0.1446	0.4118	0.3043	0.2614	0.1446	0.4118	0.2614	0.1075	0.1168	0.15	0.031	0.0373
RI.0000311	RPL22B	0.6532	0.6554	0.6746	0.5048	0.5073	0.485	0.6746	0.6532	0.5073	0.485	0.6532	0.5048	0.0214	0.0223	0.148	7.9e-05	0.000733
RI.0000179	AIM11	0.5636	0.6264	0.6547	0.4189	0.4085	0.3821	0.6547	0.5636	0.4189	0.3821	0.5636	0.4189	0.0911	0.0368	0.145	0.00806	0.0115
RI.0000250	COF1	0.2652	0.2365	0.2385	0.1271	0.1299	0.1411	0.2652	0.2365	0.1411	0.1271	0.2652	0.1271	0.0287	0.014	0.138	0.00203	0.00459
RI.0000008	RPS14B	0.4888	0.5153	0.4568	0.3527	0.3078	0.2751	0.5153	0.4568	0.3527	0.2751	0.4888	0.3527	0.0585	0.0776	0.136	0.00433	0.00762
RI.0000127	SNC1	0.3006	0.2843	0.264	0.1646	0.1881	0.1828	0.3006	0.264	0.1881	0.1646	0.3006	0.1646	0.0366	0.0235	0.136	0.0021	0.00467
RI.0000009	RPS25A	0.2251	0.2126	0.2488	0.09	0.0785	0.1116	0.2488	0.2126	0.1116	0.0785	0.2251	0.09	0.0362	0.0331	0.135	0.000736	0.00263
RI.0000038	ECM33	0.1815	0.1663	0.1665	0.0489	0.0423	0.0457	0.1815	0.1663	0.0489	0.0423	0.1815	0.0489	0.0152	0.0066	0.133	0.000469	0.00198
RI.0000199	SMD2	0.3248	0.3636	0.3182	0.1923	0.0569	0.1458	0.3636	0.3182	0.1923	0.0569	0.3248	0.1923	0.0454	0.1354	0.132	0.0253	0.0312
RI.0000328	DID4	0.3182	0.3289	0.3584	0.1873	0.1667	0.1261	0.3584	0.3182	0.1873	0.1261	0.3182	0.1873	0.0402	0.0612	0.131	0.00221	0.00467
RI.0000176	ERV41	0.314	0.3258	0.3166	0.184	0.172	0.1773	0.3258	0.314	0.184	0.172	0.314	0.184	0.0118	0.012	0.13	9.38e-06	0.000309
RI.0000201	OSW5	0.4974	0.5279	0.427	0.3684	0.4148	0.3974	0.5279	0.427	0.4148	0.3684	0.4974	0.3684	0.1009	0.0464	0.129	0.0761	0.0822
RI.0000040	RPS29B	0.7778	0.7635	0.8063	0.649	0.6542	0.648	0.8063	0.7635	0.6542	0.648	0.7778	0.649	0.0428	0.0062	0.129	0.00782	0.0113
RI.0000225	RPL24B	0.3175	0.3217	0.3419	0.1898	0.2078	0.2231	0.3419	0.3175	0.2231	0.1898	0.3175	0.1898	0.0244	0.0333	0.128	0.000789	0.00273
RI.0000019	PTC7	0.8646	0.7778	0.856	0.7407	0.5657	0.6328	0.8646	0.7778	0.7407	0.5657	0.8646	0.7407	0.0868	0.175	0.124	0.047	0.0541
RI.0000136	RPS24A	0.174	0.1458	0.1429	0.05	0.0462	0.0486	0.174	0.1429	0.05	0.0462	0.174	0.05	0.0311	0.0038	0.124	0.00803	0.0115
RI.0000175	LSM7	0.2121	0.1904	0.1718	0.0891	0.0953	0.1029	0.2121	0.1718	0.1029	0.0891	0.2121	0.0891	0.0403	0.0138	0.123	0.00861	0.0121
RI.0000291	RPL37A	0.2005	0.2014	0.2198	0.0781	0.0695	0.0835	0.2198	0.2005	0.0835	0.0695	0.2005	0.0781	0.0193	0.014	0.122	0.000183	0.00105
RI.0000229	YIP3	0.2767	0.2751	0.2531	0.1544	0.1393	0.1606	0.2767	0.2531	0.1606	0.1393	0.2767	0.1544	0.0236	0.0213	0.122	0.000354	0.00165
RI.0000026	RPS24B	0.2829	0.261	0.2655	0.1623	0.1413	0.1531	0.2829	0.261	0.1623	0.1413	0.2829	0.1623	0.0219	0.021	0.121	0.000212	0.00115
RI.0000241	RPL24A	0.2447	0.2225	0.2485	0.1242	0.1077	0.12	0.2485	0.2225	0.1242	0.1077	0.2447	0.1242	0.026	0.0165	0.12	0.000628	0.00234
RI.0000296	PCC1	0.6203	0.5853	0.5898	0.5025	0.4554	0.4974	0.6203	0.5853	0.5025	0.4554	0.6203	0.5025	0.035	0.0471	0.118	0.00474	0.00811
RI.0000095	RPS17B	0.3998	0.366	0.3992	0.2815	0.2751	0.2882	0.3998	0.366	0.2882	0.2751	0.3998	0.2815	0.0338	0.0131	0.118	0.00607	0.00953
RI.0000165	RPL2B	0.1772	0.2039	0.2036	0.0599	0.0458	0.0705	0.2039	0.1772	0.0705	0.0458	0.1772	0.0599	0.0267	0.0247	0.117	0.000356	0.00165
RI.0000251	SFT1	0.6986	0.6267	0.7093	0.5814	0.614	0.6142	0.7093	0.6267	0.6142	0.5814	0.6986	0.5814	0.0826	0.0328	0.117	0.0855	0.0913
RI.0000151	COX4	0.3574	0.3343	0.3493	0.2419	0.285	0.2188	0.3574	0.3343	0.285	0.2188	0.3574	0.2419	0.0231	0.0662	0.115	0.0263	0.0318
RI.0000298	RPL39	0.1691	0.1963	0.1534	0.0545	0.0448	0.0508	0.1963	0.1534	0.0545	0.0448	0.1691	0.0545	0.0429	0.0097	0.115	0.00778	0.0113
RI.0000097	YDL012C	0.6	0.5645	0.6201	0.4847	0.5525	0.5071	0.6201	0.5645	0.5525	0.4847	0.6	0.4847	0.0556	0.0678	0.115	0.0377	0.0439
RI.0000187	SEC14	0.2857	0.2098	0.25	0.1723	0.1142	0.0963	0.2857	0.2098	0.1723	0.0963	0.2857	0.1723	0.0759	0.076	0.113	0.019	0.0241
RI.0000286	PFY1	0.267	0.2755	0.2869	0.1566	0.1423	0.1654	0.2869	0.267	0.1654	0.1423	0.267	0.1566	0.0199	0.0231	0.11	0.000188	0.00105
RI.0000162	SIM1	0.3987	0.414	0.4835	0.2888	0.248	0.2329	0.4835	0.3987	0.2888	0.2329	0.3987	0.2888	0.0848	0.0559	0.11	0.00768	0.0113
RI.0000235	VPS75	0.5656	0.5866	0.5068	0.4551	0.5528	0.4607	0.5866	0.5068	0.5528	0.4551	0.5656	0.4551	0.0798	0.0977	0.11	0.19	0.197
RI.0000034	HMRA1	0.3589	0.3571	0.3147	0.2494	0.2416	0.2306	0.3589	0.3147	0.2494	0.2306	0.3589	0.2494	0.0442	0.0188	0.109	0.0111	0.0151
RI.0000015	RPS22B	0.7738	0.7699	0.7746	0.6667	0.5897	0.717	0.7746	0.7699	0.717	0.5897	0.7738	0.6667	0.0047	0.1273	0.107	0.0897	0.0952
RI.0000263	GOT1	0.3729	0.3333	0.3587	0.268	0.2279	0.1867	0.3729	0.3333	0.268	0.1867	0.3729	0.268	0.0396	0.0813	0.105	0.0176	0.0226
RI.0000273	RPS29A	0.1504	0.1614	0.1345	0.045	0.0579	0.0495	0.1614	0.1345	0.0579	0.045	0.1504	0.045	0.0269	0.0129	0.105	0.00177	0.00426
RI.0000308	RPO26	0.2	0.2387	0.2207	0.0971	0.1108	0.1283	0.2387	0.2	0.1283	0.0971	0.2	0.0971	0.0387	0.0312	0.103	0.00201	0.00459
RI.0000193	RPS6B	0.2841	0.2893	0.2984	0.1813	0.1814	0.1872	0.2984	0.2841	0.1872	0.1813	0.2841	0.1813	0.0143	0.0059	0.103	0.000254	0.0013
RI.0000160	YGR001C	0.2522	0.232	0.2866	0.1519	0.1111	0.1183	0.2866	0.232	0.1519	0.1111	0.2522	0.1519	0.0546	0.0408	0.1	0.00367	0.00674
RI.0000323	RPS13	0.1854	0.1732	0.1859	0.0878	0.0805	0.0978	0.1859	0.1732	0.0978	0.0805	0.1854	0.0878	0.0127	0.0173	0.0976	0.000174	0.00105
RI.0000067	RPS30A	0.281	0.2663	0.2824	0.1837	0.2067	0.1926	0.2824	0.2663	0.2067	0.1837	0.281	0.1837	0.0161	0.023	0.0973	0.000849	0.00278
RI.0000232	RPL13A	0.1412	0.136	0.1547	0.0445	0.0351	0.0413	0.1547	0.136	0.0445	0.0351	0.1412	0.0445	0.0187	0.0094	0.0967	0.000543	0.00215
RI.0000252	RPS26B	0.2055	0.1772	0.1949	0.1089	0.0938	0.1034	0.2055	0.1772	0.1089	0.0938	0.2055	0.1089	0.0283	0.0151	0.0966	0.00217	0.00467
RI.0000113	RPS4A	0.118	0.1278	0.1178	0.0276	0.0249	0.0314	0.1278	0.1178	0.0314	0.0249	0.118	0.0276	0.01	0.0065	0.0904	9.87e-05	0.000783
RI.0000058	RPL26A	0.2024	0.1794	0.1719	0.1126	0.1009	0.0949	0.2024	0.1719	0.1126	0.0949	0.2024	0.1126	0.0305	0.0177	0.0898	0.00369	0.00674
RI.0000339	RPL29	0.2781	0.2759	0.2996	0.1895	0.1547	0.1863	0.2996	0.2759	0.1895	0.1547	0.2781	0.1895	0.0237	0.0348	0.0886	0.0022	0.00467
RI.0000240	RPL33B	0.1319	0.1382	0.1265	0.0447	0.053	0.0455	0.1382	0.1265	0.053	0.0447	0.1319	0.0447	0.0117	0.0083	0.0872	6e-05	0.000671
RI.0000215	BMH2	0.2139	0.2234	0.1583	0.1283	0.1304	0.157	0.2234	0.1583	0.157	0.1283	0.2139	0.1283	0.0651	0.0287	0.0856	0.0805	0.0864
RI.0000208	RPL2A	0.3657	0.3708	0.3582	0.2801	0.2838	0.2989	0.3708	0.3582	0.2989	0.2801	0.3657	0.2801	0.0126	0.0188	0.0856	0.000816	0.00275
RI.0000128	RPL16A	0.1712	0.1453	0.1616	0.0872	0.0716	0.078	0.1712	0.1453	0.0872	0.0716	0.1712	0.0872	0.0259	0.0156	0.084	0.00195	0.00459
RI.0000164	RPL36B	0.1457	0.1245	0.1402	0.0617	0.0574	0.0643	0.1457	0.1245	0.0643	0.0574	0.1457	0.0617	0.0212	0.0069	0.084	0.00385	0.00697
RI.0000152	RPS19B	0.1759	0.1706	0.169	0.0932	0.0985	0.0987	0.1759	0.169	0.0987	0.0932	0.1759	0.0932	0.0069	0.0055	0.0827	1.3e-05	0.000309
RI.0000066	RPL6B	0.1216	0.1194	0.1176	0.0394	0.0366	0.0325	0.1216	0.1176	0.0394	0.0325	0.1216	0.0394	0.004	0.0069	0.0822	2.76e-05	0.000446
RI.0000268	RPS9B	0.1346	0.1247	0.1252	0.0527	0.0483	0.0596	0.1346	0.1247	0.0596	0.0483	0.1346	0.0527	0.0099	0.0113	0.0819	8.49e-05	0.000733
RI.0000267	YRA1	0.3643	0.3427	0.3754	0.2838	0.2722	0.2786	0.3754	0.3427	0.2838	0.2722	0.3643	0.2838	0.0327	0.0116	0.0805	0.00757	0.0112
RI.0000071	TAF14	0.4769	0.4697	0.4968	0.3973	0.3296	0.3129	0.4968	0.4697	0.3973	0.3129	0.4769	0.3973	0.0271	0.0844	0.0796	0.0262	0.0318
RI.0000233	ARF2	0.1746	0.1659	0.1404	0.0951	0.0814	0.0983	0.1746	0.1404	0.0983	0.0814	0.1746	0.0951	0.0342	0.0169	0.0795	0.00976	0.0136
RI.0000315	GIM4	0.6289	0.6542	0.6606	0.5495	0.5274	0.4842	0.6606	0.6289	0.5495	0.4842	0.6289	0.5495	0.0317	0.0653	0.0794	0.00995	0.0138
RI.0000011	VMA9	0.2525	0.2466	0.2438	0.1743	0.1512	0.1419	0.2525	0.2438	0.1743	0.1419	0.2525	0.1743	0.0087	0.0324	0.0782	0.00749	0.0112
RI.0000114	RPL35A	0.1393	0.144	0.1414	0.0624	0.053	0.0552	0.144	0.1393	0.0624	0.053	0.1393	0.0624	0.0047	0.0094	0.0769	0.000153	0.000969
RI.0000157	KEI1	0.1752	0.1453	0.1719	0.0988	0.1361	0.0859	0.1752	0.1453	0.1361	0.0859	0.1752	0.0988	0.0299	0.0502	0.0764	0.0414	0.048
RI.0000016	YGR001C	0.2851	0.226	0.2957	0.2089	0.1377	0.1676	0.2957	0.226	0.2089	0.1377	0.2851	0.2089	0.0697	0.0712	0.0762	0.0313	0.0374
RI.0000153	YPR170W-B	0.1169	0.1251	0.1184	0.0413	0.0399	0.0473	0.1251	0.1169	0.0473	0.0399	0.1169	0.0413	0.0082	0.0074	0.0756	2.4e-05	0.000446
RI.0000194	NOG2	0.0844	0.0409	0.0589	0.0099	0.0158	0.0169	0.0844	0.0409	0.0169	0.0099	0.0844	0.0099	0.0435	0.007	0.0745	0.0608	0.0684
RI.0000255	YOP1	0.1411	0.1402	0.1751	0.0673	0.0927	0.0847	0.1751	0.1402	0.0927	0.0673	0.1411	0.0673	0.0349	0.0254	0.0738	0.0101	0.0138
RI.0000087	YPR063C	0.1665	0.1793	0.1953	0.093	0.077	0.089	0.1953	0.1665	0.093	0.077	0.1665	0.093	0.0288	0.016	0.0735	0.00173	0.00426
RI.0000322	RPS14A	0.1056	0.1008	0.1097	0.0328	0.0268	0.0342	0.1097	0.1008	0.0342	0.0268	0.1056	0.0328	0.0089	0.0074	0.0728	3.07e-05	0.000449
RI.0000177	SAR1	0.1436	0.1693	0.1489	0.071	0.0756	0.1085	0.1693	0.1436	0.1085	0.071	0.1436	0.071	0.0257	0.0375	0.0726	0.0117	0.0155
RI.0000277	RPL14B	0.0975	0.0873	0.0842	0.0256	0.0238	0.0261	0.0975	0.0842	0.0261	0.0238	0.0975	0.0256	0.0133	0.0023	0.0719	0.00308	0.0061
RI.0000182	RPL22A	0.1216	0.0982	0.1064	0.0498	0.0443	0.0531	0.1216	0.0982	0.0531	0.0443	0.1216	0.0498	0.0234	0.0088	0.0718	0.00685	0.0106
RI.0000314	CGI121	0.5362	0.4335	0.4145	0.4652	0.4871	0.4255	0.5362	0.4145	0.4871	0.4255	0.5362	0.4652	0.1217	0.0616	0.071	0.963	0.968
RI.0000299	HNT1	0.3876	0.3703	0.3963	0.3178	0.3197	0.3202	0.3963	0.3703	0.3202	0.3178	0.3876	0.3178	0.026	0.0024	0.0698	0.0127	0.0166
RI.0000017	RPL25	0.0923	0.0932	0.0929	0.0225	0.0203	0.0206	0.0932	0.0923	0.0225	0.0203	0.0923	0.0225	0.0009	0.0022	0.0698	1.15e-05	0.000309
RI.0000230	RPL21B	0.0893	0.0741	0.0773	0.0208	0.0261	0.0326	0.0893	0.0741	0.0326	0.0208	0.0893	0.0208	0.0152	0.0118	0.0685	0.00108	0.00319
RI.0000213	RPS23B	0.094	0.0743	0.0902	0.0255	0.025	0.0283	0.094	0.0743	0.0283	0.025	0.094	0.0255	0.0197	0.0033	0.0685	0.00852	0.0121
RI.0000084	RPL30	0.1236	0.123	0.1287	0.059	0.0584	0.0667	0.1287	0.123	0.0667	0.0584	0.1236	0.059	0.0057	0.0083	0.0646	9.98e-05	0.000783
RI.0000020	RPS21A	0.0892	0.0918	0.0813	0.0254	0.0169	0.0203	0.0918	0.0813	0.0254	0.0169	0.0892	0.0254	0.0105	0.0085	0.0638	0.000113	0.000826
RI.0000341	RIM1	0.1344	0.1383	0.1546	0.0715	0.0745	0.0762	0.1546	0.1344	0.0762	0.0715	0.1344	0.0715	0.0202	0.0047	0.0629	0.00606	0.00953
RI.0000271	RPL40B	0.0901	0.1018	0.0932	0.029	0.0301	0.0448	0.1018	0.0901	0.0448	0.029	0.0901	0.029	0.0117	0.0158	0.0611	0.00109	0.00319
RI.0000024	GLC7	0.1221	0.1295	0.1283	0.0611	0.0587	0.0637	0.1295	0.1221	0.0637	0.0587	0.1221	0.0611	0.0074	0.005	0.061	6.77e-05	0.000707
RI.0000099	SUN4	0.1087	0.1043	0.1067	0.0481	0.0588	0.0317	0.1087	0.1043	0.0588	0.0317	0.1087	0.0481	0.0044	0.0271	0.0606	0.0148	0.0193
RI.0000010	PMI40	0.1145	0.1146	0.1513	0.0561	0.0588	0.0457	0.1513	0.1145	0.0588	0.0457	0.1145	0.0561	0.0368	0.0131	0.0584	0.0188	0.024
RI.0000334	RPL27B	0.0927	0.0874	0.112	0.0359	0.0366	0.0515	0.112	0.0874	0.0515	0.0359	0.0927	0.0359	0.0246	0.0156	0.0568	0.00518	0.00863
RI.0000131	UBC4	0.0853	0.0843	0.0717	0.0303	0.0339	0.0328	0.0853	0.0717	0.0339	0.0303	0.0853	0.0303	0.0136	0.0036	0.055	0.0058	0.00926
RI.0000274	YOS1	0.3257	0.4747	0.2883	0.2707	0.2483	0.14	0.4747	0.2883	0.2707	0.14	0.3257	0.2707	0.1864	0.1307	0.055	0.117	0.124
RI.0000059	RPL18B	0.1558	0.1659	0.1513	0.1039	0.0865	0.1017	0.1659	0.1513	0.1039	0.0865	0.1558	0.1039	0.0146	0.0174	0.0519	0.00124	0.00349
RI.0000219	RPL26B	0.1215	0.1145	0.1106	0.0703	0.0651	0.069	0.1215	0.1106	0.0703	0.0651	0.1215	0.0703	0.0109	0.0052	0.0512	0.00106	0.00319
RI.0000042	RPS4B	0.0741	0.0573	0.0751	0.023	0.0211	0.0193	0.0751	0.0573	0.023	0.0193	0.0741	0.023	0.0178	0.0037	0.0511	0.0122	0.0161
RI.0000090	RPL21A	0.0791	0.061	0.0654	0.0287	0.0221	0.0344	0.0791	0.061	0.0344	0.0221	0.0791	0.0287	0.0181	0.0123	0.0504	0.00569	0.00916
RI.0000330	EFB1	0.0824	0.0809	0.0896	0.034	0.035	0.0339	0.0896	0.0809	0.035	0.0339	0.0824	0.034	0.0087	0.0011	0.0484	0.0025	0.00516
RI.0000135	TEF4	0.0765	0.0696	0.0782	0.0282	0.027	0.0274	0.0782	0.0696	0.0282	0.027	0.0765	0.0282	0.0086	0.0012	0.0483	0.00268	0.00548
RI.0000080	RPL7B	0.1098	0.113	0.1237	0.0623	0.0716	0.0624	0.1237	0.1098	0.0716	0.0623	0.1098	0.0623	0.0139	0.0093	0.0475	0.00099	0.00319
RI.0000302	RPS6A	0.2283	0.2292	0.2369	0.1815	0.1406	0.1626	0.2369	0.2283	0.1815	0.1406	0.2283	0.1815	0.0086	0.0409	0.0468	0.0227	0.0282
RI.0000031	RPP1B	0.0665	0.0703	0.0673	0.0205	0.0187	0.0227	0.0703	0.0665	0.0227	0.0187	0.0665	0.0205	0.0038	0.004	0.046	8.44e-06	0.000309
RI.0000108	RPS8A	0.08	0.0763	0.0711	0.0359	0.0228	0.0314	0.08	0.0711	0.0359	0.0228	0.08	0.0359	0.0089	0.0131	0.0441	0.00111	0.0032
RI.0000340	RPS23A	0.063	0.0542	0.0585	0.0199	0.0211	0.0197	0.063	0.0542	0.0211	0.0197	0.063	0.0199	0.0088	0.0014	0.0431	0.00353	0.00658
RI.0000211	RPS11A	0.0809	0.0812	0.088	0.0381	0.0386	0.0392	0.088	0.0809	0.0392	0.0381	0.0809	0.0381	0.0071	0.0011	0.0428	0.00229	0.00478
RI.0000039	GPI15	0.6233	0.6469	0.7244	0.5812	0.5236	0.5773	0.7244	0.6233	0.5812	0.5236	0.6233	0.5812	0.1011	0.0576	0.0421	0.055	0.0626
RI.0000103	RPS10B	0.0722	0.0704	0.072	0.0307	0.029	0.031	0.0722	0.0704	0.031	0.029	0.0722	0.0307	0.0018	0.002	0.0415	1.14e-06	0.000108
RI.0000332	RPS16A	0.0601	0.0499	0.0529	0.0206	0.0203	0.0256	0.0601	0.0499	0.0256	0.0203	0.0601	0.0206	0.0102	0.0053	0.0395	0.00215	0.00467
RI.0000002	RPS0B	0.051	0.0465	0.0475	0.0116	0.0146	0.0166	0.051	0.0465	0.0166	0.0116	0.051	0.0116	0.0045	0.005	0.0394	7.07e-05	0.000707
RI.0000224	RPS11B	0.0707	0.0784	0.0664	0.032	0.0317	0.0364	0.0784	0.0664	0.0364	0.0317	0.0707	0.032	0.012	0.0047	0.0387	0.00313	0.00613
RI.0000242	TUB1	0.2021	0.2495	0.1829	0.1634	0.0968	0.1005	0.2495	0.1829	0.1634	0.0968	0.2021	0.1634	0.0666	0.0666	0.0387	0.0361	0.0426
RI.0000123	RPL28	0.1299	0.1286	0.1339	0.0921	0.0863	0.0928	0.1339	0.1286	0.0928	0.0863	0.1299	0.0921	0.0053	0.0065	0.0378	0.00015	0.000969
RI.0000269	RPL27A	0.06	0.058	0.0679	0.0241	0.0237	0.0227	0.0679	0.058	0.0241	0.0227	0.06	0.0241	0.0099	0.0014	0.0359	0.0054	0.00877
RI.0000290	RPS19A	0.1151	0.1076	0.1091	0.08	0.0728	0.0746	0.1151	0.1076	0.08	0.0728	0.1151	0.08	0.0075	0.0072	0.0351	0.000389	0.00168
RI.0000052	RPS16B	0.0568	0.0454	0.0629	0.0222	0.021	0.0213	0.0629	0.0454	0.0222	0.021	0.0568	0.0222	0.0175	0.0012	0.0346	0.0222	0.0278
RI.0000214	ACT1	0.0811	0.0867	0.081	0.0468	0.0498	0.0511	0.0867	0.081	0.0511	0.0468	0.0811	0.0468	0.0057	0.0043	0.0343	0.000272	0.00136
RI.0000083	RPL6A	0.0518	0.0487	0.0508	0.0188	0.0171	0.0172	0.0518	0.0487	0.0188	0.0171	0.0518	0.0188	0.0031	0.0017	0.033	3.75e-05	0.000475
RI.0000185	RPS18B	0.0608	0.0601	0.0609	0.0281	0.0366	0.0301	0.0609	0.0601	0.0366	0.0281	0.0608	0.0281	0.0008	0.0085	0.0327	0.0073	0.0112
RI.0000307	RPL34A	0.0536	0.0512	0.0442	0.022	0.016	0.0249	0.0536	0.0442	0.0249	0.016	0.0536	0.022	0.0094	0.0089	0.0316	0.00177	0.00426
RI.0000166	RPS7B	0.0621	0.0637	0.0624	0.0311	0.0261	0.0244	0.0637	0.0621	0.0311	0.0244	0.0621	0.0311	0.0016	0.0067	0.031	0.00202	0.00459
RI.0000295	DTD1	0.1157	0.102	0.1229	0.0851	0.0206	0.0393	0.1229	0.102	0.0851	0.0206	0.1157	0.0851	0.0209	0.0645	0.0306	0.0651	0.0723
RI.0000227	RPS10A	0.0569	0.0599	0.0561	0.0287	0.0316	0.0368	0.0599	0.0561	0.0368	0.0287	0.0569	0.0287	0.0038	0.0081	0.0282	0.00276	0.00558
RI.0000234	RPL32	0.0468	0.046	0.047	0.0197	0.021	0.0204	0.047	0.046	0.021	0.0197	0.0468	0.0197	0.001	0.0013	0.0271	1.11e-06	0.000108
RI.0000337	RPS18A	0.0502	0.0441	0.0487	0.0243	0.0202	0.0224	0.0502	0.0441	0.0243	0.0202	0.0502	0.0243	0.0061	0.0041	0.0259	0.000723	0.00263
RI.0000155	RPL17A	0.0408	0.0413	0.0429	0.0153	0.0148	0.0167	0.0429	0.0408	0.0167	0.0148	0.0408	0.0153	0.0021	0.0019	0.0255	7.54e-06	0.000309
RI.0000316	RPL17B	0.0509	0.0558	0.0628	0.0261	0.0282	0.0326	0.0628	0.0509	0.0326	0.0261	0.0509	0.0261	0.0119	0.0065	0.0248	0.0053	0.00876
RI.0000046	RPS21B	0.0468	0.0455	0.0414	0.0225	0.0187	0.0235	0.0468	0.0414	0.0235	0.0187	0.0468	0.0225	0.0054	0.0048	0.0243	0.000491	0.00203
RI.0000061	ASC1	0.0369	0.0393	0.0445	0.0134	0.0157	0.0149	0.0445	0.0369	0.0157	0.0134	0.0369	0.0134	0.0076	0.0023	0.0235	0.00451	0.00779
RI.0000171	RPS7A	0.0324	0.0343	0.0366	0.0106	0.0094	0.0113	0.0366	0.0324	0.0113	0.0094	0.0324	0.0106	0.0042	0.0019	0.0218	0.000561	0.00218
RI.0000183	RPL23A	0.0434	0.0462	0.0491	0.0222	0.0225	0.0221	0.0491	0.0434	0.0225	0.0221	0.0434	0.0222	0.0057	0.0004	0.0212	0.00451	0.00779
RI.0000117	RPL16B	0.1007	0.0691	0.0996	0.0807	0.0799	0.0726	0.1007	0.0691	0.0807	0.0726	0.1007	0.0807	0.0316	0.0081	0.02	0.364	0.374
RI.0000130	RPL14A	0.0355	0.035	0.0371	0.0164	0.0148	0.0156	0.0371	0.035	0.0164	0.0148	0.0355	0.0164	0.0021	0.0016	0.0191	2.82e-05	0.000446
RI.0000231	RPL34B	0.0312	0.0273	0.0305	0.0127	0.012	0.0124	0.0312	0.0273	0.0127	0.012	0.0312	0.0127	0.0039	0.0007	0.0185	0.00392	0.00703
RI.0000021	RPL7A	0.0343	0.0369	0.039	0.0158	0.0152	0.0159	0.039	0.0343	0.0159	0.0152	0.0343	0.0158	0.0047	0.0007	0.0185	0.00342	0.00643
RI.0000309	RPL31B	0.0321	0.029	0.0344	0.0144	0.017	0.0165	0.0344	0.029	0.017	0.0144	0.0321	0.0144	0.0054	0.0026	0.0177	0.00297	0.00594
RI.0000275	RPL23B	0.0259	0.0227	0.023	0.0083	0.0103	0.0108	0.0259	0.0227	0.0108	0.0083	0.0259	0.0083	0.0032	0.0025	0.0176	0.000573	0.00218
RI.0000089	RPL33A	0.0289	0.0345	0.0314	0.0115	0.0086	0.0084	0.0345	0.0289	0.0115	0.0084	0.0289	0.0115	0.0056	0.0031	0.0174	0.000824	0.00275
RI.0000181	RPL40A	0.072	0.0616	0.0763	0.0546	0.0431	0.0565	0.0763	0.0616	0.0565	0.0431	0.072	0.0546	0.0147	0.0134	0.0174	0.0374	0.0439
RI.0000310	DBP2	0.025	0.0229	0.0193	0.0095	0.0077	0.0069	0.025	0.0193	0.0095	0.0069	0.025	0.0095	0.0057	0.0026	0.0155	0.0054	0.00877
RI.0000088	RPL31A	0.0221	0.0253	0.0217	0.0068	0.0061	0.0085	0.0253	0.0217	0.0085	0.0061	0.0221	0.0068	0.0036	0.0024	0.0153	0.000747	0.00263
RI.0000014	OST5	0.1387	0.1446	0.1418	0.1236	0.0906	0.106	0.1446	0.1387	0.1236	0.0906	0.1387	0.1236	0.0059	0.033	0.0151	0.0628	0.0702
RI.0000105	RUB1	0.2026	0.2449	0.2312	0.1876	0.1786	0.1899	0.2449	0.2026	0.1899	0.1786	0.2026	0.1876	0.0423	0.0113	0.015	0.0725	0.0796
RI.0000245	RPS0A	0.0238	0.026	0.0268	0.0095	0.0076	0.0104	0.0268	0.0238	0.0104	0.0076	0.0238	0.0095	0.003	0.0028	0.0143	0.000186	0.00105
RI.0000195	YPR010C-A	0.1973	0.1053	0.1971	0.1833	0.1542	0.1746	0.1973	0.1053	0.1833	0.1542	0.1973	0.1833	0.092	0.0291	0.014	0.907	0.921
RI.0000086	GIM5	0.2772	0.3861	0.3249	0.2638	0.137	0.1576	0.3861	0.2772	0.2638	0.137	0.2772	0.2638	0.1089	0.1268	0.0134	0.0492	0.0563
RI.0000228	RPL18A	0.0195	0.0195	0.0176	0.0111	0.008	0.0095	0.0195	0.0176	0.0111	0.008	0.0195	0.0111	0.0019	0.0031	0.0084	0.00164	0.00424
RI.0000170	YBL059W	0.6358	0.6984	0.7515	0.6316	0.5786	0.5741	0.7515	0.6358	0.6316	0.5741	0.6358	0.6316	0.1157	0.0575	0.0042	0.0753	0.082
RI.0000236	RPS9A	0.3287	0.3092	0.3208	0.3255	0.2897	0.2874	0.3287	0.3092	0.3255	0.2874	0.3287	0.3255	0.0195	0.0381	0.0032	0.268	0.277
RI.0000102	RPL42B	0.6146	0.599	0.6003	0.6128	0.6223	0.6314	0.6146	0.599	0.6314	0.6128	0.6146	0.6128	0.0156	0.0186	0.0018	0.0755	0.082
RI.0000261	YML053C	1	1	1	1	1	1	1	1	1	1	1	1	0	0	0	1	1
RI.0000045	HAC1	0.9922	0.9959	0.9963	0.9925	0.9948	0.9964	0.9963	0.9922	0.9964	0.9925	0.9922	0.9925	0.0041	0.0039	-0.0003	0.899	0.918
RI.0000129	RPS29A	0.9976	1	0.9976	1	1	1	1	0.9976	1	1	0.9976	1	0.0024	0	-0.0024	0.184	0.192
RI.0000289	MRM2	0.8903	0.8295	0.7742	0.9115	0.9085	0.8681	0.8903	0.7742	0.9115	0.8681	0.8903	0.9115	0.1161	0.0434	-0.0212	0.184	0.192
RI.0000172	CPT1	0.025	0.159	0.061	0.0625	0.1032	0.0636	0.159	0.025	0.1032	0.0625	0.025	0.0625	0.134	0.0407	-0.0375	0.911	0.921
