# Supplementary material
Source: HighWire-hosted journal article supplement (doi:10.1101/rna.079917.123)
Supplement: Supplemental_Table_2_Luc7T_vs_WT.xlsx [file Supplemental_Table_2_Luc7T_vs_WT.xlsx]

## Sheet: Sheet1
event_id	gene_id	Luc7T_rep1	Luc7T_rep2	Luc7T_rep3	WT_rep1	WT_rep2	WT_rep3	max.luc7t	min.luc7t	max.wt	min.wt	meanpsi.luc7t	meanpsi.wt	spanpsi.luc7t	spanpsi.wt	deltapsi	t_test_p	FDR
RI.0000331	UBC5	0.2944	0.2603	0.2995	0.1888	0.2434	0.2651	0.2995	0.2603	0.2651	0.1888	0.2944	0.1888	0.0392	0.0763	0.106	0.133	0.383
RI.0000008	RPS14B	0.4495	0.4483	0.4806	0.3527	0.3078	0.2751	0.4806	0.4483	0.3527	0.2751	0.4495	0.3527	0.0323	0.0776	0.0968	0.0111	0.174
RI.0000081	QCR9	0.4563	0.4647	0.4438	0.3807	0.5949	0.4921	0.4647	0.4438	0.5949	0.3807	0.4563	0.3807	0.0209	0.2142	0.0756	0.636	0.778
RI.0000311	RPL22B	0.577	0.6575	0.6808	0.5048	0.5073	0.485	0.6808	0.577	0.5073	0.485	0.577	0.5048	0.1038	0.0223	0.0722	0.0416	0.243
RI.0000201	OSW5	0.4394	0.4124	0.3268	0.3684	0.4148	0.3974	0.4394	0.3268	0.4148	0.3684	0.4394	0.3684	0.1126	0.0464	0.071	0.987	1
RI.0000267	YRA1	0.3531	0.3673	0.3032	0.2838	0.2722	0.2786	0.3673	0.3032	0.2838	0.2722	0.3531	0.2838	0.0641	0.0116	0.0693	0.0794	0.304
RI.0000127	SNC1	0.2187	0.2507	0.2007	0.1646	0.1881	0.1828	0.2507	0.2007	0.1881	0.1646	0.2187	0.1646	0.05	0.0235	0.0541	0.073	0.3
RI.0000215	BMH2	0.1805	0.1279	0.1304	0.1283	0.1304	0.157	0.1805	0.1279	0.157	0.1283	0.1805	0.1283	0.0526	0.0287	0.0522	0.718	0.841
RI.0000156	SEC17	0.1301	0.1091	0.1045	0.0926	0.1487	0.167	0.1301	0.1045	0.167	0.0926	0.1301	0.0926	0.0256	0.0744	0.0375	0.443	0.653
RI.0000041	ERD2	0.1638	0.1788	0.1437	0.1265	0.1154	0.1561	0.1788	0.1437	0.1561	0.1154	0.1638	0.1265	0.0351	0.0407	0.0373	0.139	0.383
RI.0000335	CNB1	0.1497	0.1455	0.1238	0.1146	0.1611	0.1416	0.1497	0.1238	0.1611	0.1146	0.1497	0.1146	0.0259	0.0465	0.0351	0.973	1
RI.0000018	MMS2	0.1235	0.0861	0.0902	0.089	0.1118	0.0593	0.1235	0.0861	0.1118	0.0593	0.1235	0.089	0.0374	0.0525	0.0345	0.532	0.724
RI.0000236	RPS9A	0.3546	0.3889	0.4119	0.3255	0.2897	0.2874	0.4119	0.3546	0.3255	0.2874	0.3546	0.3255	0.0573	0.0381	0.0291	0.018	0.181
RI.0000194	NOG2	0.0339	0.0379	0.0335	0.0099	0.0158	0.0169	0.0379	0.0335	0.0169	0.0099	0.0339	0.0099	0.0044	0.007	0.024	0.00241	0.135
RI.0000080	RPL7B	0.084	0.0948	0.1032	0.0623	0.0716	0.0624	0.1032	0.084	0.0716	0.0623	0.084	0.0623	0.0192	0.0093	0.0217	0.0188	0.181
RI.0000308	RPO26	0.1186	0.1136	0.1335	0.0971	0.1108	0.1283	0.1335	0.1136	0.1283	0.0971	0.1186	0.0971	0.0199	0.0312	0.0215	0.422	0.636
RI.0000200	YCL012C	0.1492	0.1239	0.1223	0.1314	0.277	0.1554	0.1492	0.1223	0.277	0.1314	0.1492	0.1314	0.0269	0.1456	0.0178	0.338	0.553
RI.0000059	RPL18B	0.1205	0.1338	0.1241	0.1039	0.0865	0.1017	0.1338	0.1205	0.1039	0.0865	0.1205	0.1039	0.0133	0.0174	0.0166	0.0159	0.174
RI.0000188	TAN1	0.2263	0.1776	0.1626	0.2108	0.1607	0.2722	0.2263	0.1626	0.2722	0.1607	0.2263	0.2108	0.0637	0.1115	0.0155	0.539	0.727
RI.0000191	ERV1	0.2599	0.3062	0.2519	0.2453	0.2577	0.27	0.3062	0.2519	0.27	0.2453	0.2599	0.2453	0.0543	0.0247	0.0146	0.48	0.685
RI.0000132	MOB2	0.2125	0.1275	0.0558	0.2	0.1513	0.2048	0.2125	0.0558	0.2048	0.1513	0.2125	0.2	0.1567	0.0535	0.0125	0.363	0.573
RI.0000263	GOT1	0.2802	0.3041	0.2483	0.268	0.2279	0.1867	0.3041	0.2483	0.268	0.1867	0.2802	0.268	0.0558	0.0813	0.0122	0.163	0.411
RI.0000176	ERV41	0.196	0.1468	0.1629	0.184	0.172	0.1773	0.196	0.1468	0.184	0.172	0.196	0.184	0.0492	0.012	0.012	0.594	0.764
RI.0000175	LSM7	0.0993	0.0987	0.1077	0.0891	0.0953	0.1029	0.1077	0.0987	0.1029	0.0891	0.0993	0.0891	0.009	0.0138	0.0102	0.288	0.529
RI.0000178	LSM2	0.1402	0.123	0.1121	0.1312	0.1563	0.1589	0.1402	0.1121	0.1589	0.1312	0.1402	0.1312	0.0281	0.0277	0.009	0.121	0.359
RI.0000177	SAR1	0.08	0.0627	0.0781	0.071	0.0756	0.1085	0.08	0.0627	0.1085	0.071	0.08	0.071	0.0173	0.0375	0.009	0.448	0.653
RI.0000130	RPL14A	0.0231	0.0227	0.0189	0.0164	0.0148	0.0156	0.0231	0.0189	0.0164	0.0148	0.0231	0.0164	0.0042	0.0016	0.0067	0.0355	0.224
RI.0000240	RPL33B	0.0511	0.0511	0.0449	0.0447	0.053	0.0455	0.0511	0.0449	0.053	0.0447	0.0511	0.0447	0.0062	0.0083	0.0064	0.719	0.841
RI.0000172	CPT1	0.0688	0.0638	0.0723	0.0625	0.1032	0.0636	0.0723	0.0638	0.1032	0.0625	0.0688	0.0625	0.0085	0.0407	0.0063	0.607	0.768
RI.0000131	UBC4	0.0363	0.0347	0.0276	0.0303	0.0339	0.0328	0.0363	0.0276	0.0339	0.0303	0.0363	0.0303	0.0087	0.0036	0.006	0.866	0.939
RI.0000316	RPL17B	0.0313	0.0312	0.0317	0.0261	0.0282	0.0326	0.0317	0.0312	0.0326	0.0261	0.0313	0.0261	0.0005	0.0065	0.0052	0.331	0.553
RI.0000185	RPS18B	0.0331	0.0311	0.0293	0.0281	0.0366	0.0301	0.0331	0.0293	0.0366	0.0281	0.0331	0.0281	0.0038	0.0085	0.005	0.887	0.956
RI.0000334	RPL27B	0.0408	0.0469	0.0525	0.0359	0.0366	0.0515	0.0525	0.0408	0.0515	0.0359	0.0408	0.0359	0.0117	0.0156	0.0049	0.433	0.648
RI.0000002	RPS0B	0.0163	0.0123	0.0122	0.0116	0.0146	0.0166	0.0163	0.0122	0.0166	0.0116	0.0163	0.0116	0.0041	0.005	0.0047	0.754	0.851
RI.0000155	RPL17A	0.0194	0.0193	0.0201	0.0153	0.0148	0.0167	0.0201	0.0193	0.0167	0.0148	0.0194	0.0153	0.0008	0.0019	0.0041	0.00982	0.174
RI.0000230	RPL21B	0.0246	0.0256	0.0287	0.0208	0.0261	0.0326	0.0287	0.0246	0.0326	0.0208	0.0246	0.0208	0.0041	0.0118	0.0038	0.96	1
RI.0000341	RIM1	0.0748	0.0677	0.0695	0.0715	0.0745	0.0762	0.0748	0.0677	0.0762	0.0715	0.0748	0.0715	0.0071	0.0047	0.0033	0.262	0.503
RI.0000166	RPS7B	0.0343	0.0293	0.0372	0.0311	0.0261	0.0244	0.0372	0.0293	0.0311	0.0244	0.0343	0.0311	0.0079	0.0067	0.0032	0.106	0.33
RI.0000061	ASC1	0.0164	0.0156	0.0136	0.0134	0.0157	0.0149	0.0164	0.0136	0.0157	0.0134	0.0164	0.0134	0.0028	0.0023	0.003	0.646	0.778
RI.0000271	RPL40B	0.0318	0.0322	0.0319	0.029	0.0301	0.0448	0.0322	0.0318	0.0448	0.029	0.0318	0.029	0.0004	0.0158	0.0028	0.653	0.778
RI.0000088	RPL31A	0.009	0.0089	0.0081	0.0068	0.0061	0.0085	0.009	0.0081	0.0085	0.0061	0.009	0.0068	0.0009	0.0024	0.0022	0.153	0.404
RI.0000224	RPS11B	0.0341	0.039	0.0366	0.032	0.0317	0.0364	0.039	0.0341	0.0364	0.0317	0.0341	0.032	0.0049	0.0047	0.0021	0.198	0.424
RI.0000245	RPS0A	0.0113	0.012	0.011	0.0095	0.0076	0.0104	0.012	0.011	0.0104	0.0076	0.0113	0.0095	0.001	0.0028	0.0018	0.0977	0.325
RI.0000045	HAC1	0.9942	0.9887	0.9893	0.9925	0.9948	0.9964	0.9942	0.9887	0.9964	0.9925	0.9942	0.9925	0.0055	0.0039	0.0017	0.15	0.402
RI.0000275	RPL23B	0.01	0.013	0.0082	0.0083	0.0103	0.0108	0.013	0.0082	0.0108	0.0083	0.01	0.0083	0.0048	0.0025	0.0017	0.731	0.844
RI.0000182	RPL22A	0.0505	0.0617	0.0651	0.0498	0.0443	0.0531	0.0651	0.0505	0.0531	0.0443	0.0505	0.0498	0.0146	0.0088	0.0007	0.138	0.383
RI.0000309	RPL31B	0.0149	0.0161	0.0206	0.0144	0.017	0.0165	0.0206	0.0149	0.017	0.0144	0.0149	0.0144	0.0057	0.0026	0.0005	0.567	0.739
RI.0000171	RPS7A	0.0111	0.01	0.0101	0.0106	0.0094	0.0113	0.0111	0.01	0.0113	0.0094	0.0111	0.0106	0.0011	0.0019	0.0005	0.962	1
RI.0000277	RPL14B	0.026	0.0281	0.0289	0.0256	0.0238	0.0261	0.0289	0.026	0.0261	0.0238	0.026	0.0256	0.0029	0.0023	0.0004	0.0907	0.313
RI.0000233	ARF2	0.0955	0.1373	0.1074	0.0951	0.0814	0.0983	0.1373	0.0955	0.0983	0.0814	0.0955	0.0951	0.0418	0.0169	0.0004	0.215	0.446
RI.0000227	RPS10A	0.0291	0.0312	0.0328	0.0287	0.0316	0.0368	0.0328	0.0291	0.0368	0.0287	0.0291	0.0287	0.0037	0.0081	0.0004	0.646	0.778
RI.0000029	RPS22B	1	1	1	1	1	1	1	1	1	1	1	1	0	0	0	1	1
RI.0000129	RPS29A	1	0.9885	0.995	1	1	1	1	0.9885	1	1	1	1	0.0115	0	0	1	1
RI.0000261	YML053C	1	1	1	1	1	1	1	1	1	1	1	1	0	0	0	1	1
RI.0000135	TEF4	0.0276	0.0242	0.0261	0.0282	0.027	0.0274	0.0276	0.0242	0.0282	0.027	0.0276	0.0282	0.0034	0.0012	-0.0006	0.248	0.488
RI.0000123	RPL28	0.0908	0.108	0.1131	0.0921	0.0863	0.0928	0.1131	0.0908	0.0928	0.0863	0.0908	0.0921	0.0223	0.0065	-0.0013	0.174	0.42
RI.0000063	YBR090C	0.9969	1	0.9984	0.9982	1	0.9919	1	0.9969	1	0.9919	0.9969	0.9982	0.0031	0.0081	-0.0013	0.563	0.739
RI.0000153	YPR170W-B	0.0398	0.0382	0.0418	0.0413	0.0399	0.0473	0.0418	0.0382	0.0473	0.0399	0.0398	0.0413	0.0036	0.0074	-0.0015	0.335	0.553
RI.0000231	RPL34B	0.0112	0.0132	0.0108	0.0127	0.012	0.0124	0.0132	0.0108	0.0127	0.012	0.0112	0.0127	0.0024	0.0007	-0.0015	0.487	0.686
RI.0000113	RPS4A	0.026	0.0344	0.034	0.0276	0.0249	0.0314	0.0344	0.026	0.0314	0.0249	0.026	0.0276	0.0084	0.0065	-0.0016	0.358	0.571
RI.0000021	RPL7A	0.0141	0.0126	0.0119	0.0158	0.0152	0.0159	0.0141	0.0119	0.0159	0.0152	0.0141	0.0158	0.0022	0.0007	-0.0017	0.0396	0.239
RI.0000328	DID4	0.1855	0.148	0.1414	0.1873	0.1667	0.1261	0.1855	0.1414	0.1873	0.1261	0.1855	0.1873	0.0441	0.0612	-0.0018	0.943	1
RI.0000031	RPP1B	0.0186	0.0183	0.0181	0.0205	0.0187	0.0227	0.0186	0.0181	0.0227	0.0187	0.0186	0.0205	0.0005	0.004	-0.0019	0.183	0.424
RI.0000340	RPS23A	0.0179	0.0225	0.0221	0.0199	0.0211	0.0197	0.0225	0.0179	0.0211	0.0197	0.0179	0.0199	0.0046	0.0014	-0.002	0.728	0.844
RI.0000052	RPS16B	0.0201	0.0221	0.0218	0.0222	0.021	0.0213	0.0221	0.0201	0.0222	0.021	0.0201	0.0222	0.002	0.0012	-0.0021	0.831	0.906
RI.0000183	RPL23A	0.0199	0.0187	0.0178	0.0222	0.0225	0.0221	0.0199	0.0178	0.0225	0.0221	0.0199	0.0222	0.0021	0.0004	-0.0023	0.0257	0.191
RI.0000089	RPL33A	0.0088	0.0102	0.0095	0.0115	0.0086	0.0084	0.0102	0.0088	0.0115	0.0084	0.0088	0.0115	0.0014	0.0031	-0.0027	1	1
RI.0000269	RPL27A	0.0213	0.0217	0.0213	0.0241	0.0237	0.0227	0.0217	0.0213	0.0241	0.0227	0.0213	0.0241	0.0004	0.0014	-0.0028	0.0289	0.192
RI.0000234	RPL32	0.0169	0.0188	0.0159	0.0197	0.021	0.0204	0.0188	0.0159	0.021	0.0197	0.0169	0.0197	0.0029	0.0013	-0.0028	0.0482	0.251
RI.0000211	RPS11A	0.0349	0.0416	0.0411	0.0381	0.0386	0.0392	0.0416	0.0349	0.0392	0.0381	0.0349	0.0381	0.0067	0.0011	-0.0032	0.818	0.902
RI.0000083	RPL6A	0.0154	0.0181	0.0162	0.0188	0.0171	0.0172	0.0181	0.0154	0.0188	0.0171	0.0154	0.0188	0.0027	0.0017	-0.0034	0.316	0.551
RI.0000103	RPS10B	0.0271	0.0314	0.0225	0.0307	0.029	0.031	0.0314	0.0225	0.031	0.029	0.0271	0.0307	0.0089	0.002	-0.0036	0.335	0.553
RI.0000221	RPS22B	0.205	0.2075	0.2042	0.2087	0.2073	0.1959	0.2075	0.2042	0.2087	0.1959	0.205	0.2087	0.0033	0.0128	-0.0037	0.735	0.844
RI.0000228	RPL18A	0.0072	0.0086	0.0074	0.0111	0.008	0.0095	0.0086	0.0072	0.0111	0.008	0.0072	0.0111	0.0014	0.0031	-0.0039	0.172	0.42
RI.0000020	RPS21A	0.0215	0.0247	0.0268	0.0254	0.0169	0.0203	0.0268	0.0215	0.0254	0.0169	0.0215	0.0254	0.0053	0.0085	-0.0039	0.311	0.551
RI.0000332	RPS16A	0.0167	0.0202	0.0224	0.0206	0.0203	0.0256	0.0224	0.0167	0.0256	0.0203	0.0167	0.0206	0.0057	0.0053	-0.0039	0.372	0.574
RI.0000017	RPL25	0.0177	0.0242	0.0213	0.0225	0.0203	0.0206	0.0242	0.0177	0.0225	0.0203	0.0177	0.0225	0.0065	0.0022	-0.0048	0.976	1
RI.0000213	RPS23B	0.0206	0.0283	0.0242	0.0255	0.025	0.0283	0.0283	0.0206	0.0283	0.025	0.0206	0.0255	0.0077	0.0033	-0.0049	0.498	0.696
RI.0000307	RPL34A	0.017	0.0168	0.0218	0.022	0.016	0.0249	0.0218	0.0168	0.0249	0.016	0.017	0.022	0.005	0.0089	-0.005	0.483	0.685
RI.0000337	RPS18A	0.0186	0.0198	0.0185	0.0243	0.0202	0.0224	0.0198	0.0185	0.0243	0.0202	0.0186	0.0243	0.0013	0.0041	-0.0057	0.0935	0.317
RI.0000214	ACT1	0.041	0.0428	0.0452	0.0468	0.0498	0.0511	0.0452	0.041	0.0511	0.0468	0.041	0.0468	0.0042	0.0043	-0.0058	0.0241	0.191
RI.0000099	SUN4	0.0422	0.0385	0.0303	0.0481	0.0588	0.0317	0.0422	0.0303	0.0588	0.0317	0.0422	0.0481	0.0119	0.0271	-0.0059	0.37	0.574
RI.0000330	EFB1	0.0277	0.027	0.0252	0.034	0.035	0.0339	0.0277	0.0252	0.035	0.0339	0.0277	0.034	0.0025	0.0011	-0.0063	0.00323	0.135
RI.0000310	DBP2	0.0032	0.003	0.0036	0.0095	0.0077	0.0069	0.0036	0.003	0.0095	0.0069	0.0032	0.0095	0.0006	0.0026	-0.0063	0.0206	0.182
RI.0000010	PMI40	0.0495	0.048	0.0308	0.0561	0.0588	0.0457	0.0495	0.0308	0.0588	0.0457	0.0495	0.0561	0.0187	0.0131	-0.0066	0.22	0.447
RI.0000046	RPS21B	0.0158	0.0206	0.0222	0.0225	0.0187	0.0235	0.0222	0.0158	0.0235	0.0187	0.0158	0.0225	0.0064	0.0048	-0.0067	0.45	0.653
RI.0000157	KEI1	0.0917	0.0782	0.052	0.0988	0.1361	0.0859	0.0917	0.052	0.1361	0.0859	0.0917	0.0988	0.0397	0.0502	-0.0071	0.163	0.411
RI.0000038	ECM33	0.0417	0.0386	0.04	0.0489	0.0423	0.0457	0.0417	0.0386	0.0489	0.0423	0.0417	0.0489	0.0031	0.0066	-0.0072	0.083	0.304
RI.0000042	RPS4B	0.0156	0.0185	0.0217	0.023	0.0211	0.0193	0.0217	0.0156	0.023	0.0193	0.0156	0.023	0.0061	0.0037	-0.0074	0.299	0.539
RI.0000273	RPS29A	0.037	0.0457	0.052	0.045	0.0579	0.0495	0.052	0.037	0.0579	0.045	0.037	0.045	0.015	0.0129	-0.008	0.365	0.573
RI.0000164	RPL36B	0.0535	0.057	0.0529	0.0617	0.0574	0.0643	0.057	0.0529	0.0643	0.0574	0.0535	0.0617	0.0041	0.0069	-0.0082	0.0592	0.266
RI.0000255	YOP1	0.0583	0.08	0.0586	0.0673	0.0927	0.0847	0.08	0.0583	0.0927	0.0673	0.0583	0.0673	0.0217	0.0254	-0.009	0.2	0.424
RI.0000056	NCB2	0.2911	0.28	0.2578	0.3006	0.3084	0.3327	0.2911	0.2578	0.3327	0.3006	0.2911	0.3006	0.0333	0.0321	-0.0095	0.0523	0.255
RI.0000064	RPS25B	0.1803	0.2472	0.244	0.1901	0.2439	0.2416	0.2472	0.1803	0.2439	0.1901	0.1803	0.1901	0.0669	0.0538	-0.0098	0.963	1
RI.0000108	RPS8A	0.0257	0.0244	0.0237	0.0359	0.0228	0.0314	0.0257	0.0237	0.0359	0.0228	0.0257	0.0359	0.002	0.0131	-0.0102	0.292	0.532
RI.0000323	RPS13	0.077	0.099	0.0886	0.0878	0.0805	0.0978	0.099	0.077	0.0978	0.0805	0.077	0.0878	0.022	0.0173	-0.0108	0.954	1
RI.0000066	RPL6B	0.0284	0.0405	0.0381	0.0394	0.0366	0.0325	0.0405	0.0284	0.0394	0.0325	0.0284	0.0394	0.0121	0.0069	-0.011	0.913	0.979
RI.0000084	RPL30	0.0476	0.0554	0.06	0.059	0.0584	0.0667	0.06	0.0476	0.0667	0.0584	0.0476	0.059	0.0124	0.0083	-0.0114	0.199	0.424
RI.0000090	RPL21A	0.0169	0.0242	0.0266	0.0287	0.0221	0.0344	0.0266	0.0169	0.0344	0.0221	0.0169	0.0287	0.0097	0.0123	-0.0118	0.276	0.522
RI.0000219	RPL26B	0.058	0.0644	0.0617	0.0703	0.0651	0.069	0.0644	0.058	0.0703	0.0651	0.058	0.0703	0.0064	0.0052	-0.0123	0.0509	0.255
RI.0000128	RPL16A	0.0745	0.0895	0.0805	0.0872	0.0716	0.078	0.0895	0.0745	0.0872	0.0716	0.0745	0.0872	0.015	0.0156	-0.0127	0.704	0.834
RI.0000290	RPS19A	0.067	0.0739	0.0687	0.08	0.0728	0.0746	0.0739	0.067	0.08	0.0728	0.067	0.08	0.0069	0.0072	-0.013	0.119	0.359
RI.0000322	RPS14A	0.0197	0.0226	0.023	0.0328	0.0268	0.0342	0.023	0.0197	0.0342	0.0268	0.0197	0.0328	0.0033	0.0074	-0.0131	0.0359	0.224
RI.0000298	RPL39	0.0406	0.0457	0.0559	0.0545	0.0448	0.0508	0.0559	0.0406	0.0545	0.0448	0.0406	0.0545	0.0153	0.0097	-0.0139	0.651	0.778
RI.0000232	RPL13A	0.0295	0.0346	0.0474	0.0445	0.0351	0.0413	0.0474	0.0295	0.0445	0.0351	0.0295	0.0445	0.0179	0.0094	-0.015	0.637	0.778
RI.0000070	RPS27B	0.088	0.1042	0.111	0.103	0.1012	0.1068	0.111	0.088	0.1068	0.1012	0.088	0.103	0.023	0.0056	-0.015	0.743	0.844
RI.0000138	QCR10	0.1917	0.2548	0.2717	0.2074	0.2602	0.1972	0.2717	0.1917	0.2602	0.1972	0.1917	0.2074	0.08	0.063	-0.0157	0.6	0.767
RI.0000009	RPS25A	0.0733	0.0853	0.0848	0.09	0.0785	0.1116	0.0853	0.0733	0.1116	0.0785	0.0733	0.09	0.012	0.0331	-0.0167	0.337	0.553
RI.0000225	RPL24B	0.1729	0.1779	0.1827	0.1898	0.2078	0.2231	0.1827	0.1729	0.2231	0.1898	0.1729	0.1898	0.0098	0.0333	-0.0169	0.0842	0.304
RI.0000136	RPS24A	0.0331	0.032	0.0496	0.05	0.0462	0.0486	0.0496	0.032	0.05	0.0462	0.0331	0.05	0.0176	0.0038	-0.0169	0.217	0.446
RI.0000268	RPS9B	0.0358	0.0493	0.0525	0.0527	0.0483	0.0596	0.0525	0.0358	0.0596	0.0483	0.0358	0.0527	0.0167	0.0113	-0.0169	0.287	0.529
RI.0000250	COF1	0.1096	0.1615	0.1447	0.1271	0.1299	0.1411	0.1615	0.1096	0.1411	0.1271	0.1096	0.1271	0.0519	0.014	-0.0175	0.742	0.844
RI.0000173	TMA20	0.0867	0.0969	0.0985	0.1053	0.1187	0.1399	0.0985	0.0867	0.1399	0.1053	0.0867	0.1053	0.0118	0.0346	-0.0186	0.1	0.327
RI.0000152	RPS19B	0.0745	0.1024	0.0905	0.0932	0.0985	0.0987	0.1024	0.0745	0.0987	0.0932	0.0745	0.0932	0.0279	0.0055	-0.0187	0.445	0.653
RI.0000024	GLC7	0.0422	0.0353	0.0403	0.0611	0.0587	0.0637	0.0422	0.0353	0.0637	0.0587	0.0422	0.0611	0.0069	0.005	-0.0189	0.00154	0.135
RI.0000114	RPL35A	0.0435	0.0481	0.0318	0.0624	0.053	0.0552	0.0481	0.0318	0.0624	0.053	0.0435	0.0624	0.0163	0.0094	-0.0189	0.0625	0.273
RI.0000291	RPL37A	0.0582	0.07	0.0741	0.0781	0.0695	0.0835	0.0741	0.0582	0.0835	0.0695	0.0582	0.0781	0.0159	0.014	-0.0199	0.202	0.424
RI.0000062	SRC1	0.4602	0.3489	0.2938	0.4803	0.4203	0.4946	0.4602	0.2938	0.4946	0.4203	0.4602	0.4803	0.1664	0.0743	-0.0201	0.174	0.42
RI.0000181	RPL40A	0.0342	0.0486	0.0432	0.0546	0.0431	0.0565	0.0486	0.0342	0.0565	0.0431	0.0342	0.0546	0.0144	0.0134	-0.0204	0.188	0.424
RI.0000016	YGR001C	0.1882	0.1763	0.1653	0.2089	0.1377	0.1676	0.1882	0.1653	0.2089	0.1377	0.1882	0.2089	0.0229	0.0712	-0.0207	0.829	0.906
RI.0000252	RPS26B	0.0873	0.1043	0.0906	0.1089	0.0938	0.1034	0.1043	0.0873	0.1089	0.0938	0.0873	0.1089	0.017	0.0151	-0.0216	0.309	0.551
RI.0000014	OST5	0.1009	0.1047	0.106	0.1236	0.0906	0.106	0.106	0.1009	0.1236	0.0906	0.1009	0.1236	0.0051	0.033	-0.0227	0.793	0.885
RI.0000091	RPL35B	0.0459	0.0702	0.071	0.0706	0.0633	0.0519	0.071	0.0459	0.0706	0.0519	0.0459	0.0706	0.0251	0.0187	-0.0247	0.967	1
RI.0000105	RUB1	0.162	0.1596	0.1464	0.1876	0.1786	0.1899	0.162	0.1464	0.1899	0.1786	0.162	0.1876	0.0156	0.0113	-0.0256	0.0102	0.174
RI.0000144	RPL42A	0.0608	0.0913	0.0998	0.0873	0.0973	0.1002	0.0998	0.0608	0.1002	0.0873	0.0608	0.0873	0.039	0.0129	-0.0265	0.457	0.658
RI.0000005	POP8	0.0971	0.1483	0.0874	0.1241	0.1538	0.1173	0.1483	0.0874	0.1538	0.1173	0.0971	0.1241	0.0609	0.0365	-0.027	0.409	0.622
RI.0000295	DTD1	0.0569	0.0693	0.0638	0.0851	0.0206	0.0393	0.0693	0.0569	0.0851	0.0206	0.0569	0.0851	0.0124	0.0645	-0.0282	0.517	0.718
RI.0000086	GIM5	0.2356	0.2261	0.1814	0.2638	0.137	0.1576	0.2356	0.1814	0.2638	0.137	0.2356	0.2638	0.0542	0.1268	-0.0282	0.56	0.739
RI.0000299	HNT1	0.2878	0.2648	0.2807	0.3178	0.3197	0.3202	0.2878	0.2648	0.3202	0.3178	0.2878	0.3178	0.023	0.0024	-0.03	0.0247	0.191
RI.0000243	RFA2	0.0904	0.149	0.1159	0.124	0.0714	0.0791	0.149	0.0904	0.124	0.0714	0.0904	0.124	0.0586	0.0526	-0.0336	0.317	0.551
RI.0000235	VPS75	0.4214	0.4227	0.3072	0.4551	0.5528	0.4607	0.4227	0.3072	0.5528	0.4551	0.4214	0.4551	0.1155	0.0977	-0.0337	0.103	0.33
RI.0000087	YPR063C	0.0589	0.0696	0.086	0.093	0.077	0.089	0.086	0.0589	0.093	0.077	0.0589	0.093	0.0271	0.016	-0.0341	0.198	0.424
RI.0000165	RPL2B	0.025	0.0426	0.0522	0.0599	0.0458	0.0705	0.0522	0.025	0.0705	0.0458	0.025	0.0599	0.0272	0.0247	-0.0349	0.155	0.404
RI.0000162	SIM1	0.2534	0.2041	0.2633	0.2888	0.248	0.2329	0.2633	0.2041	0.2888	0.2329	0.2534	0.2888	0.0592	0.0559	-0.0354	0.547	0.733
RI.0000274	YOS1	0.2353	0.1405	0.2053	0.2707	0.2483	0.14	0.2353	0.1405	0.2707	0.14	0.2353	0.2707	0.0948	0.1307	-0.0354	0.628	0.778
RI.0000137	IMD4	0.0647	0.0822	0.0776	0.1019	0.1178	0.1029	0.0822	0.0647	0.1178	0.1019	0.0647	0.1019	0.0175	0.0159	-0.0372	0.0112	0.174
RI.0000067	RPS30A	0.1452	0.1528	0.1819	0.1837	0.2067	0.1926	0.1819	0.1452	0.2067	0.1837	0.1452	0.1837	0.0367	0.023	-0.0385	0.0712	0.299
RI.0000229	YIP3	0.1159	0.1452	0.1237	0.1544	0.1393	0.1606	0.1452	0.1159	0.1606	0.1393	0.1159	0.1544	0.0293	0.0213	-0.0385	0.105	0.33
RI.0000313	RPL36A	0.1225	0.1626	0.1602	0.162	0.1818	0.1546	0.1626	0.1225	0.1818	0.1546	0.1225	0.162	0.0401	0.0272	-0.0395	0.323	0.553
RI.0000247	PRE3	0.1026	0.1211	0.1163	0.1422	0.115	0.1305	0.1211	0.1026	0.1422	0.115	0.1026	0.1422	0.0185	0.0272	-0.0396	0.182	0.424
RI.0000160	YGR001C	0.112	0.1166	0.0896	0.1519	0.1111	0.1183	0.1166	0.0896	0.1519	0.1111	0.112	0.1519	0.027	0.0408	-0.0399	0.246	0.488
RI.0000117	RPL16B	0.0399	0.0478	0.0478	0.0807	0.0799	0.0726	0.0478	0.0399	0.0807	0.0726	0.0399	0.0807	0.0079	0.0081	-0.0408	0.000906	0.135
RI.0000241	RPL24A	0.0809	0.1048	0.0939	0.1242	0.1077	0.12	0.1048	0.0809	0.1242	0.1077	0.0809	0.1242	0.0239	0.0165	-0.0433	0.0528	0.255
RI.0000286	PFY1	0.111	0.1505	0.1373	0.1566	0.1423	0.1654	0.1505	0.111	0.1654	0.1423	0.111	0.1566	0.0395	0.0231	-0.0456	0.196	0.424
RI.0000209	RPS8B	0.0867	0.1218	0.1528	0.1355	0.1242	0.1353	0.1528	0.0867	0.1355	0.1242	0.0867	0.1355	0.0661	0.0113	-0.0488	0.618	0.775
RI.0000151	COX4	0.1912	0.2609	0.2415	0.2419	0.285	0.2188	0.2609	0.1912	0.285	0.2188	0.1912	0.2419	0.0697	0.0662	-0.0507	0.574	0.744
RI.0000242	TUB1	0.1107	0.0933	0.1071	0.1634	0.0968	0.1005	0.1107	0.0933	0.1634	0.0968	0.1107	0.1634	0.0174	0.0666	-0.0527	0.528	0.724
RI.0000208	RPL2A	0.2268	0.3078	0.275	0.2801	0.2838	0.2989	0.3078	0.2268	0.2989	0.2801	0.2268	0.2801	0.081	0.0188	-0.0533	0.533	0.724
RI.0000319	YOS1	0.4307	0.4577	0.526	0.4859	0.5676	0.585	0.526	0.4307	0.585	0.4859	0.4307	0.4859	0.0953	0.0991	-0.0552	0.148	0.402
RI.0000026	RPS24B	0.1067	0.154	0.1435	0.1623	0.1413	0.1531	0.154	0.1067	0.1623	0.1413	0.1067	0.1623	0.0473	0.021	-0.0556	0.351	0.565
RI.0000058	RPL26A	0.0566	0.0772	0.0843	0.1126	0.1009	0.0949	0.0843	0.0566	0.1126	0.0949	0.0566	0.1126	0.0277	0.0177	-0.056	0.047	0.251
RI.0000297	ARP2	0.2339	0.2568	0.194	0.2935	0.2727	0.2412	0.2568	0.194	0.2935	0.2412	0.2339	0.2935	0.0628	0.0523	-0.0596	0.164	0.411
RI.0000076	VMA10	0.1956	0.2283	0.1852	0.2556	0.2218	0.2788	0.2283	0.1852	0.2788	0.2218	0.1956	0.2556	0.0431	0.057	-0.06	0.0839	0.304
RI.0000034	HMRA1	0.187	0.1915	0.1882	0.2494	0.2416	0.2306	0.1915	0.187	0.2494	0.2306	0.187	0.2494	0.0045	0.0188	-0.0624	0.00799	0.174
RI.0000187	SEC14	0.1094	0.1259	0.1055	0.1723	0.1142	0.0963	0.1259	0.1055	0.1723	0.0963	0.1094	0.1723	0.0204	0.076	-0.0629	0.609	0.768
RI.0000102	RPL42B	0.549	0.6011	0.5827	0.6128	0.6223	0.6314	0.6011	0.549	0.6314	0.6128	0.549	0.6128	0.0521	0.0186	-0.0638	0.0868	0.305
RI.0000192	YHR097C	0.1683	0.1212	0.0748	0.2339	0.2481	0.2423	0.1683	0.0748	0.2481	0.2339	0.1683	0.2339	0.0935	0.0142	-0.0656	0.0442	0.25
RI.0000193	RPS6B	0.1128	0.1542	0.1393	0.1813	0.1814	0.1872	0.1542	0.1128	0.1872	0.1813	0.1128	0.1813	0.0414	0.0059	-0.0685	0.0551	0.259
RI.0000095	RPS17B	0.2124	0.2496	0.2511	0.2815	0.2751	0.2882	0.2511	0.2124	0.2882	0.2751	0.2124	0.2815	0.0387	0.0131	-0.0691	0.0637	0.273
RI.0000015	RPS22B	0.5973	0.754	0.5688	0.6667	0.5897	0.717	0.754	0.5688	0.717	0.5897	0.5973	0.6667	0.1852	0.1273	-0.0694	0.81	0.898
RI.0000019	PTC7	0.6681	0.7402	0.6432	0.7407	0.5657	0.6328	0.7402	0.6432	0.7407	0.5657	0.6681	0.7407	0.097	0.175	-0.0726	0.567	0.739
RI.0000217	UBC13	0.3479	0.335	0.3739	0.4246	0.5181	0.4164	0.3739	0.335	0.5181	0.4164	0.3479	0.4246	0.0389	0.1017	-0.0767	0.0776	0.304
RI.0000093	ARP9	0.1202	0.0986	0.0918	0.1983	0.1009	0.1748	0.1202	0.0918	0.1983	0.1009	0.1202	0.1983	0.0284	0.0974	-0.0781	0.198	0.424
RI.0000282	RPS17A	0.0483	0.1058	0.1027	0.1272	0.113	0.1238	0.1058	0.0483	0.1272	0.113	0.0483	0.1272	0.0575	0.0142	-0.0789	0.191	0.424
RI.0000339	RPL29	0.1102	0.1177	0.14	0.1895	0.1547	0.1863	0.14	0.1102	0.1895	0.1547	0.1102	0.1895	0.0298	0.0348	-0.0793	0.0207	0.182
RI.0000174	RPL37B	0.1013	0.1303	0.1611	0.1816	0.1871	0.204	0.1611	0.1013	0.204	0.1816	0.1013	0.1816	0.0598	0.0224	-0.0803	0.0587	0.266
RI.0000097	YDL012C	0.4033	0.435	0.4275	0.4847	0.5525	0.5071	0.435	0.4033	0.5525	0.4847	0.4033	0.4847	0.0317	0.0678	-0.0814	0.0268	0.192
RI.0000179	AIM11	0.3355	0.3007	0.3464	0.4189	0.4085	0.3821	0.3464	0.3007	0.4189	0.3821	0.3355	0.4189	0.0457	0.0368	-0.0834	0.0141	0.174
RI.0000011	VMA9	0.09	0.0936	0.085	0.1743	0.1512	0.1419	0.0936	0.085	0.1743	0.1419	0.09	0.1743	0.0086	0.0324	-0.0843	0.0157	0.174
RI.0000206	SUS1	0.1446	0.1521	0.1724	0.2317	0.2199	0.1824	0.1724	0.1446	0.2317	0.1824	0.1446	0.2317	0.0278	0.0493	-0.0871	0.0453	0.25
RI.0000133	RPL13B	0.2988	0.4162	0.4215	0.3882	0.3765	0.4127	0.4215	0.2988	0.4127	0.3765	0.2988	0.3882	0.1227	0.0362	-0.0894	0.77	0.864
RI.0000302	RPS6A	0.0892	0.1493	0.1455	0.1815	0.1406	0.1626	0.1493	0.0892	0.1815	0.1406	0.0892	0.1815	0.0601	0.0409	-0.0923	0.228	0.458
RI.0000315	GIM4	0.4558	0.5023	0.5157	0.5495	0.5274	0.4842	0.5157	0.4558	0.5495	0.4842	0.4558	0.5495	0.0599	0.0653	-0.0937	0.332	0.553
RI.0000195	YPR010C-A	0.0833	0.1625	0.1745	0.1833	0.1542	0.1746	0.1745	0.0833	0.1833	0.1542	0.0833	0.1833	0.0912	0.0291	-0.1	0.399	0.611
RI.0000039	GPI15	0.4769	0.5581	0.528	0.5812	0.5236	0.5773	0.5581	0.4769	0.5812	0.5236	0.4769	0.5812	0.0812	0.0576	-0.104	0.262	0.503
RI.0000251	SFT1	0.4682	0.5	0.5128	0.5814	0.614	0.6142	0.5128	0.4682	0.6142	0.5814	0.4682	0.5814	0.0446	0.0328	-0.113	0.0035	0.135
RI.0000239	SAC6	0.0835	0.0869	0.0777	0.2	0.1456	0.1127	0.0869	0.0777	0.2	0.1127	0.0835	0.2	0.0092	0.0873	-0.116	0.109	0.334
RI.0000266	VPS29	0.1444	0.1466	0.1538	0.2614	0.168	0.1446	0.1538	0.1444	0.2614	0.1446	0.1444	0.2614	0.0094	0.1168	-0.117	0.351	0.565
RI.0000197	RPS27A	0.3969	0.5121	0.5478	0.5212	0.5353	0.6014	0.5478	0.3969	0.6014	0.5212	0.3969	0.5212	0.1509	0.0802	-0.124	0.284	0.529
RI.0000212	TUB3	0.1943	0.2258	0.2261	0.3275	0.4124	0.3625	0.2261	0.1943	0.4124	0.3275	0.1943	0.3275	0.0318	0.0849	-0.133	0.0142	0.174
RI.0000100	UBC9	0.2188	0.273	0.2353	0.3569	0.375	0.3706	0.273	0.2188	0.375	0.3569	0.2188	0.3569	0.0542	0.0181	-0.138	0.00982	0.174
RI.0000071	TAF14	0.2578	0.2663	0.2776	0.3973	0.3296	0.3129	0.2776	0.2578	0.3973	0.3129	0.2578	0.3973	0.0198	0.0844	-0.14	0.085	0.304
RI.0000030	YBR255C-A	0.4444	0.4538	0.5123	0.589	0.5751	0.5896	0.5123	0.4444	0.5896	0.5751	0.4444	0.589	0.0679	0.0145	-0.145	0.028	0.192
RI.0000001	MRPL44	0.3101	0.4236	0.4542	0.4564	0.3488	0.4747	0.4542	0.3101	0.4747	0.3488	0.3101	0.4564	0.1441	0.1259	-0.146	0.63	0.778
RI.0000289	MRM2	0.7647	0.872	0.8284	0.9115	0.9085	0.8681	0.872	0.7647	0.9115	0.8681	0.7647	0.9115	0.1073	0.0434	-0.147	0.125	0.366
RI.0000278	HRB1	0.3664	0.4044	0.4267	0.52	0.4771	0.5549	0.4267	0.3664	0.5549	0.4771	0.3664	0.52	0.0603	0.0778	-0.154	0.0162	0.174
RI.0000170	YBL059W	0.4713	0.5226	0.4714	0.6316	0.5786	0.5741	0.5226	0.4713	0.6316	0.5741	0.4713	0.6316	0.0513	0.0575	-0.16	0.0136	0.174
RI.0000122	RPS26A	0.348	0.4214	0.516	0.5119	0.469	0.5835	0.516	0.348	0.5835	0.469	0.348	0.5119	0.168	0.1145	-0.164	0.199	0.424
RI.0000296	PCC1	0.3348	0.5095	0.3624	0.5025	0.4554	0.4974	0.5095	0.3348	0.5025	0.4554	0.3348	0.5025	0.1747	0.0471	-0.168	0.263	0.503
RI.0000145	RPS30B	0.3743	0.5044	0.474	0.5527	0.5628	0.5032	0.5044	0.3743	0.5628	0.5032	0.3743	0.5527	0.1301	0.0596	-0.178	0.139	0.383
RI.0000314	CGI121	0.2659	0.3714	0.2994	0.4652	0.4871	0.4255	0.3714	0.2659	0.4871	0.4255	0.2659	0.4652	0.1055	0.0616	-0.199	0.0233	0.191
RI.0000054	RPL7A	0.4412	0.4227	0.4779	0.6538	0.5971	0.5615	0.4779	0.4227	0.6538	0.5615	0.4412	0.6538	0.0552	0.0923	-0.213	0.0124	0.174
RI.0000040	RPS29B	0.4031	0.5353	0.5548	0.649	0.6542	0.648	0.5548	0.4031	0.6542	0.648	0.4031	0.649	0.1517	0.0062	-0.246	0.0849	0.304
