# Supplementary material
Source: HighWire-hosted journal article supplement (doi:10.1101/rna.079917.123)
Supplement: Supplemental_Table_3_Luc7D_induced_vs_uninduced.xlsx [file Supplemental_Table_3_Luc7D_induced_vs_uninduced.xlsx]

## Sheet: Sheet1
event_id	gene_id	Luc7D_I_rep1	Luc7D_I_rep2	Luc7D_I_rep3	Luc7D_UI_rep1	Luc7D_UI_rep2	Luc7D_UI_rep3	max.i	min.i	max.ui	min.ui	meanpsi.i	meanpsi.ui	spanpsi.i	spanpsi.ui	deltapsi	t_test_p	FDR
RI.0000299	HNT1	0.8882	0.9092	0.8545	0.2588	0.3237	0.2917	0.9092	0.8545	0.3237	0.2588	0.8882	0.2588	0.0547	0.0649	0.629	2.18e-05	0.000972
RI.0000080	RPL7B	0.7977	0.901	0.8096	0.209	0.2418	0.2429	0.901	0.7977	0.2429	0.209	0.7977	0.209	0.1033	0.0339	0.589	0.00121	0.00428
RI.0000018	MMS2	0.6848	0.806	0.6883	0.1156	0.1279	0.1552	0.806	0.6848	0.1552	0.1156	0.6848	0.1156	0.1212	0.0396	0.569	0.00248	0.00683
RI.0000313	RPL36A	0.764	0.8486	0.7809	0.2352	0.2652	0.2481	0.8486	0.764	0.2652	0.2352	0.764	0.2352	0.0846	0.03	0.529	0.000889	0.00382
RI.0000243	RFA2	0.8412	0.7787	0.75	0.3146	0.3975	0.4693	0.8412	0.75	0.4693	0.3146	0.8412	0.3146	0.0912	0.1547	0.527	0.00344	0.00735
RI.0000199	SMD2	0.7835	0.75	0.7413	0.2774	0.3212	0.4432	0.7835	0.7413	0.4432	0.2774	0.7835	0.2774	0.0422	0.1658	0.506	0.0104	0.0138
RI.0000186	EPT1	0.7236	0.7543	0.7086	0.2172	0.2988	0.285	0.7543	0.7086	0.2988	0.2172	0.7236	0.2172	0.0457	0.0816	0.506	0.000467	0.0031
RI.0000236	RPS9A	0.8532	0.9292	0.875	0.3636	0.3325	0.3331	0.9292	0.8532	0.3636	0.3325	0.8532	0.3636	0.076	0.0311	0.49	0.000331	0.00295
RI.0000067	RPS30A	0.7168	0.7807	0.7318	0.2372	0.2586	0.2419	0.7807	0.7168	0.2586	0.2372	0.7168	0.2372	0.0639	0.0214	0.48	0.000552	0.00315
RI.0000219	RPL26B	0.5905	0.6459	0.5528	0.1222	0.1522	0.12	0.6459	0.5528	0.1522	0.12	0.5905	0.1222	0.0931	0.0322	0.468	0.00118	0.00424
RI.0000095	RPS17B	0.7557	0.7871	0.7479	0.289	0.3897	0.354	0.7871	0.7479	0.3897	0.289	0.7557	0.289	0.0392	0.1007	0.467	0.00174	0.00517
RI.0000016	YGR001C	0.6237	0.6274	0.6652	0.1579	0.1974	0.2553	0.6652	0.6237	0.2553	0.1579	0.6237	0.1579	0.0415	0.0974	0.466	0.00106	0.00394
RI.0000206	SUS1	0.8439	0.8662	0.7806	0.3907	0.4874	0.6213	0.8662	0.7806	0.6213	0.3907	0.8439	0.3907	0.0856	0.2306	0.453	0.0265	0.03
RI.0000041	ERD2	0.6596	0.7039	0.6925	0.2098	0.3519	0.3004	0.7039	0.6596	0.3519	0.2098	0.6596	0.2098	0.0443	0.1421	0.45	0.00638	0.01
RI.0000156	SEC17	0.7266	0.7219	0.6322	0.2774	0.3431	0.28	0.7266	0.6322	0.3431	0.2774	0.7266	0.2774	0.0944	0.0657	0.449	0.000816	0.00379
RI.0000157	KEI1	0.6788	0.7061	0.5479	0.2311	0.2089	0.2943	0.7061	0.5479	0.2943	0.2089	0.6788	0.2311	0.1582	0.0854	0.448	0.00529	0.00907
RI.0000064	RPS25B	0.7095	0.8154	0.7773	0.2622	0.2998	0.2698	0.8154	0.7095	0.2998	0.2622	0.7095	0.2622	0.1059	0.0376	0.447	0.00156	0.00497
RI.0000240	RPL33B	0.571	0.6733	0.5914	0.1329	0.1613	0.1452	0.6733	0.571	0.1613	0.1329	0.571	0.1329	0.1023	0.0284	0.438	0.00278	0.00684
RI.0000263	GOT1	0.77	0.8356	0.7682	0.3333	0.3996	0.4076	0.8356	0.7682	0.4076	0.3333	0.77	0.3333	0.0674	0.0743	0.437	0.000225	0.00264
RI.0000286	PFY1	0.6784	0.7855	0.7387	0.2447	0.2696	0.2589	0.7855	0.6784	0.2696	0.2447	0.6784	0.2447	0.1071	0.0249	0.434	0.00286	0.00686
RI.0000295	DTD1	0.5221	0.6242	0.5731	0.093	0.122	0.0903	0.6242	0.5221	0.122	0.0903	0.5221	0.093	0.1021	0.0317	0.429	0.0017	0.00512
RI.0000014	OST5	0.5836	0.7075	0.5942	0.1616	0.2178	0.1697	0.7075	0.5836	0.2178	0.1616	0.5836	0.1616	0.1239	0.0562	0.422	0.00282	0.00684
RI.0000026	RPS24B	0.6065	0.6963	0.6318	0.1918	0.2172	0.2074	0.6963	0.6065	0.2172	0.1918	0.6065	0.1918	0.0898	0.0254	0.415	0.00211	0.00611
RI.0000105	RUB1	0.757	0.8192	0.7654	0.3429	0.335	0.33	0.8192	0.757	0.3429	0.33	0.757	0.3429	0.0622	0.0129	0.414	0.00138	0.00459
RI.0000308	RPO26	0.7124	0.7445	0.7327	0.2993	0.2874	0.3203	0.7445	0.7124	0.3203	0.2874	0.7124	0.2993	0.0321	0.0329	0.413	5.84e-06	0.000651
RI.0000298	RPL39	0.4983	0.5727	0.4606	0.0894	0.0865	0.0858	0.5727	0.4606	0.0894	0.0858	0.4983	0.0894	0.1121	0.0036	0.409	0.00595	0.00964
RI.0000209	RPS8B	0.6479	0.7401	0.6352	0.2397	0.2206	0.2035	0.7401	0.6352	0.2397	0.2035	0.6479	0.2397	0.1049	0.0362	0.408	0.00277	0.00684
RI.0000195	YPR010C-A	0.5797	0.5577	0.4601	0.1712	0.1633	0.188	0.5797	0.4601	0.188	0.1633	0.5797	0.1712	0.1196	0.0247	0.408	0.00837	0.0121
RI.0000340	RPS23A	0.4974	0.5424	0.4843	0.0917	0.0871	0.0757	0.5424	0.4843	0.0917	0.0757	0.4974	0.0917	0.0581	0.016	0.406	0.000907	0.00382
RI.0000221	RPS22B	0.9237	0.9888	0.9852	0.5177	0.5707	0.5282	0.9888	0.9237	0.5707	0.5177	0.9237	0.5177	0.0651	0.053	0.406	0.000136	0.00178
RI.0000070	RPS27B	0.5723	0.6789	0.5657	0.1668	0.1903	0.1961	0.6789	0.5657	0.1961	0.1668	0.5723	0.1668	0.1132	0.0293	0.406	0.00526	0.00907
RI.0000093	ARP9	0.8067	0.736	0.7435	0.4028	0.4453	0.5448	0.8067	0.736	0.5448	0.4028	0.8067	0.4028	0.0707	0.142	0.404	0.00788	0.0116
RI.0000314	CGI121	0.8224	0.8462	0.7355	0.4194	0.5612	0.5564	0.8462	0.7355	0.5612	0.4194	0.8224	0.4194	0.1107	0.1418	0.403	0.0093	0.013
RI.0000066	RPL6B	0.5004	0.5155	0.4579	0.0981	0.1099	0.0939	0.5155	0.4579	0.1099	0.0939	0.5004	0.0981	0.0576	0.016	0.402	0.00101	0.00394
RI.0000020	RPS21A	0.5191	0.6538	0.5666	0.1178	0.1185	0.099	0.6538	0.5191	0.1185	0.099	0.5191	0.1178	0.1347	0.0195	0.401	0.00597	0.00964
RI.0000128	RPL16A	0.5133	0.6612	0.5607	0.1162	0.1736	0.1444	0.6612	0.5133	0.1736	0.1162	0.5133	0.1162	0.1479	0.0574	0.397	0.00483	0.00876
RI.0000339	RPL29	0.6643	0.7438	0.6401	0.268	0.232	0.2403	0.7438	0.6401	0.268	0.232	0.6643	0.268	0.1037	0.036	0.396	0.00236	0.00658
RI.0000338	UBC8	0.9437	0.9036	0.9162	0.549	0.6452	0.6232	0.9437	0.9036	0.6452	0.549	0.9437	0.549	0.0401	0.0962	0.395	0.00354	0.00735
RI.0000306	YPR098C	0.7619	0.7869	0.7559	0.3679	0.4112	0.3712	0.7869	0.7559	0.4112	0.3679	0.7619	0.3679	0.031	0.0433	0.394	5.81e-05	0.00101
RI.0000059	RPL18B	0.6136	0.7076	0.6006	0.2204	0.2721	0.2459	0.7076	0.6006	0.2721	0.2204	0.6136	0.2204	0.107	0.0517	0.393	0.00252	0.00684
RI.0000127	SNC1	0.6953	0.7235	0.6868	0.3054	0.2289	0.2772	0.7235	0.6868	0.3054	0.2289	0.6953	0.3054	0.0367	0.0765	0.39	0.000483	0.0031
RI.0000335	CNB1	0.7917	0.8416	0.7977	0.4039	0.4698	0.3898	0.8416	0.7917	0.4698	0.3898	0.7917	0.4039	0.0499	0.08	0.388	0.000476	0.0031
RI.0000341	RIM1	0.5654	0.6257	0.5603	0.1775	0.199	0.1825	0.6257	0.5603	0.199	0.1775	0.5654	0.1775	0.0654	0.0215	0.388	0.00133	0.00449
RI.0000173	TMA20	0.6658	0.7505	0.6588	0.2784	0.3164	0.3092	0.7505	0.6588	0.3164	0.2784	0.6658	0.2784	0.0917	0.038	0.387	0.0022	0.00629
RI.0000215	BMH2	0.6258	0.6703	0.6293	0.2415	0.2437	0.2276	0.6703	0.6258	0.2437	0.2276	0.6258	0.2415	0.0445	0.0161	0.384	0.000399	0.0031
RI.0000328	DID4	0.7955	0.7543	0.7846	0.411	0.3253	0.3529	0.7955	0.7543	0.411	0.3253	0.7955	0.411	0.0412	0.0857	0.384	0.000804	0.00379
RI.0000144	RPL42A	0.5379	0.5892	0.5278	0.156	0.1644	0.1378	0.5892	0.5278	0.1644	0.1378	0.5379	0.156	0.0614	0.0266	0.382	0.000607	0.00315
RI.0000250	COF1	0.5913	0.6287	0.5483	0.2108	0.1816	0.1789	0.6287	0.5483	0.2108	0.1789	0.5913	0.2108	0.0804	0.0319	0.381	0.000903	0.00382
RI.0000271	RPL40B	0.4559	0.5072	0.4785	0.0745	0.1206	0.0901	0.5072	0.4559	0.1206	0.0745	0.4559	0.0745	0.0513	0.0461	0.381	4.63e-05	0.00101
RI.0000233	ARF2	0.5274	0.5839	0.5328	0.1538	0.1305	0.1515	0.5839	0.5274	0.1538	0.1305	0.5274	0.1538	0.0565	0.0233	0.374	0.000516	0.0031
RI.0000315	GIM4	0.8495	0.822	0.8202	0.4757	0.5062	0.5318	0.8495	0.8202	0.5318	0.4757	0.8495	0.4757	0.0293	0.0561	0.374	0.00027	0.00287
RI.0000277	RPL14B	0.4887	0.5797	0.5329	0.1197	0.1387	0.1302	0.5797	0.4887	0.1387	0.1197	0.4887	0.1197	0.091	0.019	0.369	0.00307	0.00713
RI.0000319	YOS1	0.9407	0.9353	0.9103	0.5714	0.5263	0.5531	0.9407	0.9103	0.5714	0.5263	0.9407	0.5714	0.0304	0.0451	0.369	4.31e-05	0.00101
RI.0000282	RPS17A	0.5204	0.6412	0.4954	0.1513	0.1733	0.1674	0.6412	0.4954	0.1733	0.1513	0.5204	0.1513	0.1458	0.022	0.369	0.0118	0.0149
RI.0000076	VMA10	0.7762	0.8113	0.7257	0.4094	0.4086	0.3905	0.8113	0.7257	0.4094	0.3905	0.7762	0.4094	0.0856	0.0189	0.367	0.00295	0.00692
RI.0000182	RPL22A	0.4643	0.5597	0.47	0.0983	0.1315	0.1105	0.5597	0.4643	0.1315	0.0983	0.4643	0.0983	0.0954	0.0332	0.366	0.00351	0.00735
RI.0000107	IST1	0.7325	0.7735	0.7778	0.3689	0.5899	0.461	0.7778	0.7325	0.5899	0.3689	0.7325	0.3689	0.0453	0.221	0.364	0.0404	0.0453
RI.0000058	RPL26A	0.5474	0.6413	0.5557	0.1835	0.1611	0.1605	0.6413	0.5474	0.1835	0.1605	0.5474	0.1835	0.0939	0.023	0.364	0.00343	0.00735
RI.0000166	RPS7B	0.4149	0.5223	0.3913	0.0531	0.0844	0.0751	0.5223	0.3913	0.0844	0.0531	0.4149	0.0531	0.131	0.0313	0.362	0.00879	0.0124
RI.0000162	SIM1	0.8443	0.8721	0.8292	0.483	0.4764	0.4399	0.8721	0.8292	0.483	0.4399	0.8443	0.483	0.0429	0.0431	0.361	3.26e-05	0.00101
RI.0000011	VMA9	0.6672	0.7064	0.622	0.3073	0.3561	0.3065	0.7064	0.622	0.3561	0.3065	0.6672	0.3073	0.0844	0.0496	0.36	0.000637	0.00317
RI.0000252	RPS26B	0.6193	0.7386	0.6698	0.2603	0.2465	0.2062	0.7386	0.6193	0.2603	0.2062	0.6193	0.2603	0.1193	0.0541	0.359	0.00182	0.00534
RI.0000160	YGR001C	0.5887	0.653	0.5127	0.2327	0.2539	0.2725	0.653	0.5127	0.2725	0.2327	0.5887	0.2327	0.1403	0.0398	0.356	0.0101	0.0137
RI.0000176	ERV41	0.7602	0.8571	0.8197	0.4073	0.3247	0.428	0.8571	0.7602	0.428	0.3247	0.7602	0.4073	0.0969	0.1033	0.353	0.000585	0.00315
RI.0000334	RPL27B	0.4101	0.4896	0.4379	0.0613	0.1171	0.0822	0.4896	0.4101	0.1171	0.0613	0.4101	0.0613	0.0795	0.0558	0.349	0.000427	0.0031
RI.0000266	VPS29	0.7414	0.6141	0.7227	0.3933	0.3024	0.3448	0.7414	0.6141	0.3933	0.3024	0.7414	0.3933	0.1273	0.0909	0.348	0.00324	0.00735
RI.0000040	RPS29B	0.8503	0.8997	0.8825	0.5022	0.5171	0.5218	0.8997	0.8503	0.5218	0.5022	0.8503	0.5022	0.0494	0.0196	0.348	0.000388	0.0031
RI.0000198	OM14	0.8669	0.8	0.7598	0.5204	0.5396	0.5201	0.8669	0.7598	0.5396	0.5201	0.8669	0.5204	0.1071	0.0195	0.347	0.00967	0.0132
RI.0000316	RPL17B	0.4113	0.4864	0.417	0.0664	0.0787	0.0669	0.4864	0.4113	0.0787	0.0664	0.4113	0.0664	0.0751	0.0123	0.345	0.00351	0.00735
RI.0000086	GIM5	0.8033	0.8382	0.8878	0.4597	0.4372	0.364	0.8878	0.8033	0.4597	0.364	0.8033	0.4597	0.0845	0.0957	0.344	0.000423	0.0031
RI.0000187	SEC14	0.6629	0.6752	0.6784	0.3194	0.3731	0.2895	0.6784	0.6629	0.3731	0.2895	0.6629	0.3194	0.0155	0.0836	0.344	0.00387	0.00775
RI.0000224	RPS11B	0.4137	0.4887	0.4289	0.0709	0.0994	0.075	0.4887	0.4137	0.0994	0.0709	0.4137	0.0709	0.075	0.0285	0.343	0.00144	0.00472
RI.0000296	PCC1	0.8538	0.8898	0.8066	0.5122	0.551	0.5164	0.8898	0.8066	0.551	0.5122	0.8538	0.5122	0.0832	0.0388	0.342	0.00131	0.00449
RI.0000114	RPL35A	0.4385	0.5456	0.3964	0.0962	0.1143	0.102	0.5456	0.3964	0.1143	0.0962	0.4385	0.0962	0.1492	0.0181	0.342	0.0142	0.0172
RI.0000232	RPL13A	0.4499	0.5167	0.4329	0.11	0.1307	0.1117	0.5167	0.4329	0.1307	0.11	0.4499	0.11	0.0838	0.0207	0.34	0.00342	0.00735
RI.0000056	NCB2	0.9367	0.927	0.9327	0.6	0.6364	0.597	0.9367	0.927	0.6364	0.597	0.9367	0.6	0.0097	0.0394	0.337	0.00099	0.00394
RI.0000175	LSM7	0.6383	0.5859	0.6143	0.3034	0.2651	0.3011	0.6383	0.5859	0.3034	0.2651	0.6383	0.3034	0.0524	0.0383	0.335	0.000103	0.00153
RI.0000136	RPS24A	0.417	0.4495	0.4061	0.0873	0.1259	0.0998	0.4495	0.4061	0.1259	0.0873	0.417	0.0873	0.0434	0.0386	0.33	5.75e-05	0.00101
RI.0000099	SUN4	0.5533	0.6024	0.5744	0.2259	0.1804	0.2195	0.6024	0.5533	0.2259	0.1804	0.5533	0.2259	0.0491	0.0455	0.327	5.24e-05	0.00101
RI.0000193	RPS6B	0.4969	0.6241	0.5224	0.1736	0.2278	0.1879	0.6241	0.4969	0.2278	0.1736	0.4969	0.1736	0.1272	0.0542	0.323	0.00546	0.00915
RI.0000310	DBP2	0.4348	0.4897	0.385	0.1127	0.1367	0.1401	0.4897	0.385	0.1401	0.1127	0.4348	0.1127	0.1047	0.0274	0.322	0.00618	0.00977
RI.0000146	APS3	0.6816	0.7554	0.6939	0.3629	0.5037	0.3468	0.7554	0.6816	0.5037	0.3468	0.6816	0.3629	0.0738	0.1569	0.319	0.0136	0.0168
RI.0000273	RPS29A	0.4116	0.5206	0.3968	0.0928	0.077	0.0754	0.5206	0.3968	0.0928	0.0754	0.4116	0.0928	0.1238	0.0174	0.319	0.0103	0.0138
RI.0000208	RPL2A	0.56	0.6229	0.5786	0.242	0.2663	0.2492	0.6229	0.56	0.2663	0.242	0.56	0.242	0.0629	0.0243	0.318	0.00105	0.00394
RI.0000251	SFT1	0.8042	0.9442	0.7961	0.4936	0.5719	0.5282	0.9442	0.7961	0.5719	0.4936	0.8042	0.4936	0.1481	0.0783	0.311	0.0109	0.0144
RI.0000230	RPL21B	0.3769	0.4404	0.3762	0.0665	0.092	0.0592	0.4404	0.3762	0.092	0.0592	0.3769	0.0665	0.0642	0.0328	0.31	0.00109	0.00398
RI.0000332	RPS16A	0.3896	0.4272	0.3727	0.082	0.0906	0.0675	0.4272	0.3727	0.0906	0.0675	0.3896	0.082	0.0545	0.0231	0.308	0.000702	0.0034
RI.0000177	SAR1	0.4665	0.615	0.5516	0.1585	0.1634	0.1494	0.615	0.4665	0.1634	0.1494	0.4665	0.1585	0.1485	0.014	0.308	0.0116	0.0148
RI.0000151	COX4	0.5843	0.5989	0.5123	0.2794	0.3114	0.3673	0.5989	0.5123	0.3673	0.2794	0.5843	0.2794	0.0866	0.0879	0.305	0.00271	0.00684
RI.0000135	TEF4	0.4559	0.5189	0.4289	0.1507	0.1466	0.1728	0.5189	0.4289	0.1728	0.1466	0.4559	0.1507	0.09	0.0262	0.305	0.00421	0.00796
RI.0000200	YCL012C	0.7031	0.798	0.7514	0.4	0.4545	0.4556	0.798	0.7031	0.4556	0.4	0.7031	0.4	0.0949	0.0556	0.303	0.00127	0.00443
RI.0000042	RPS4B	0.3627	0.4918	0.3949	0.0594	0.0848	0.0727	0.4918	0.3627	0.0848	0.0594	0.3627	0.0594	0.1291	0.0254	0.303	0.0104	0.0138
RI.0000038	ECM33	0.4254	0.4505	0.4196	0.1233	0.1251	0.1189	0.4505	0.4196	0.1251	0.1189	0.4254	0.1233	0.0309	0.0062	0.302	0.000639	0.00317
RI.0000217	UBC13	0.8896	0.9061	0.8916	0.5884	0.5943	0.6082	0.9061	0.8896	0.6082	0.5884	0.8896	0.5884	0.0165	0.0198	0.301	3.28e-06	0.000651
RI.0000241	RPL24A	0.4432	0.4728	0.4193	0.1452	0.1444	0.1018	0.4728	0.4193	0.1452	0.1018	0.4432	0.1452	0.0535	0.0434	0.298	0.000122	0.0017
RI.0000008	RPS14B	0.7355	0.7894	0.718	0.4426	0.454	0.444	0.7894	0.718	0.454	0.4426	0.7355	0.4426	0.0714	0.0114	0.293	0.00418	0.00796
RI.0000096	YML6	0.9158	0.8739	0.8296	0.6269	0.6897	0.6406	0.9158	0.8296	0.6897	0.6269	0.9158	0.6269	0.0862	0.0628	0.289	0.00273	0.00684
RI.0000015	RPS22B	0.9639	1	1	0.6746	0.7692	0.699	1	0.9639	0.7692	0.6746	0.9639	0.6746	0.0361	0.0946	0.289	0.0045	0.00835
RI.0000103	RPS10B	0.3406	0.3969	0.3339	0.0527	0.0892	0.0621	0.3969	0.3339	0.0892	0.0527	0.3406	0.0527	0.063	0.0365	0.288	0.000894	0.00382
RI.0000174	RPL37B	0.4706	0.5622	0.4606	0.1821	0.211	0.2068	0.5622	0.4606	0.211	0.1821	0.4706	0.1821	0.1016	0.0289	0.288	0.00783	0.0116
RI.0000148	HMRA1	0.9476	0.9349	0.955	0.6602	0.75	0.7006	0.955	0.9349	0.75	0.6602	0.9476	0.6602	0.0201	0.0898	0.287	0.00866	0.0124
RI.0000108	RPS8A	0.386	0.4761	0.3659	0.1018	0.0886	0.0734	0.4761	0.3659	0.1018	0.0734	0.386	0.1018	0.1102	0.0284	0.284	0.00805	0.0118
RI.0000097	YDL012C	0.892	0.9219	0.9226	0.6087	0.6564	0.5534	0.9226	0.892	0.6564	0.5534	0.892	0.6087	0.0306	0.103	0.283	0.00509	0.00901
RI.0000211	RPS11A	0.3518	0.4009	0.3524	0.0684	0.0984	0.0766	0.4009	0.3518	0.0984	0.0684	0.3518	0.0684	0.0491	0.03	0.283	0.00048	0.0031
RI.0000333	PBA1	0.7695	0.8304	0.8382	0.487	0.6124	0.6175	0.8382	0.7695	0.6175	0.487	0.7695	0.487	0.0687	0.1305	0.282	0.0156	0.0187
RI.0000083	RPL6A	0.3503	0.4163	0.3316	0.0685	0.0787	0.0654	0.4163	0.3316	0.0787	0.0654	0.3503	0.0685	0.0847	0.0133	0.282	0.00645	0.0101
RI.0000229	YIP3	0.5076	0.5224	0.5353	0.2314	0.2154	0.1984	0.5353	0.5076	0.2314	0.1984	0.5076	0.2314	0.0277	0.033	0.276	2.06e-05	0.000972
RI.0000021	RPL7A	0.3372	0.4249	0.3453	0.0636	0.0699	0.056	0.4249	0.3372	0.0699	0.056	0.3372	0.0636	0.0877	0.0139	0.274	0.00731	0.011
RI.0000311	RPL22B	0.9241	0.9494	0.933	0.6521	0.6838	0.6537	0.9494	0.9241	0.6838	0.6521	0.9241	0.6521	0.0253	0.0317	0.272	5.89e-05	0.00101
RI.0000307	RPL34A	0.3407	0.4055	0.3179	0.0705	0.0678	0.0519	0.4055	0.3179	0.0705	0.0519	0.3407	0.0705	0.0876	0.0186	0.27	0.00601	0.00964
RI.0000152	RPS19B	0.4176	0.5002	0.4311	0.1475	0.1545	0.1263	0.5002	0.4176	0.1545	0.1263	0.4176	0.1475	0.0826	0.0282	0.27	0.0036	0.00737
RI.0000272	YIL156W-B	0.8518	0.8831	0.858	0.5833	0.5869	0.588	0.8831	0.8518	0.588	0.5833	0.8518	0.5833	0.0313	0.0047	0.268	0.000952	0.00386
RI.0000164	RPL36B	0.4062	0.4495	0.3707	0.1395	0.1452	0.1201	0.4495	0.3707	0.1452	0.1201	0.4062	0.1395	0.0788	0.0251	0.267	0.00356	0.00735
RI.0000225	RPL24B	0.6711	0.7835	0.6849	0.4058	0.3442	0.3024	0.7835	0.6711	0.4058	0.3024	0.6711	0.4058	0.1124	0.1034	0.265	0.00162	0.00501
RI.0000167	MAF1	0.8186	0.7832	0.8079	0.5548	0.5603	0.6526	0.8186	0.7832	0.6526	0.5548	0.8186	0.5548	0.0354	0.0978	0.264	0.0141	0.0172
RI.0000123	RPL28	0.4121	0.468	0.4135	0.1505	0.1599	0.1558	0.468	0.4121	0.1599	0.1505	0.4121	0.1505	0.0559	0.0094	0.262	0.00378	0.00766
RI.0000178	LSM2	0.6183	0.7686	0.621	0.3575	0.3966	0.3673	0.7686	0.6183	0.3966	0.3575	0.6183	0.3575	0.1503	0.0391	0.261	0.0222	0.0257
RI.0000113	RPS4A	0.3609	0.4249	0.3539	0.1023	0.1133	0.0979	0.4249	0.3539	0.1133	0.0979	0.3609	0.1023	0.071	0.0154	0.259	0.00515	0.00904
RI.0000331	UBC5	0.7119	0.72	0.679	0.4526	0.5723	0.5245	0.72	0.679	0.5723	0.4526	0.7119	0.4526	0.041	0.1197	0.259	0.0226	0.026
RI.0000090	RPL21A	0.3027	0.3074	0.2544	0.0468	0.0797	0.0538	0.3074	0.2544	0.0797	0.0468	0.3027	0.0468	0.053	0.0329	0.256	0.000947	0.00386
RI.0000153	YPR170W-B	0.3773	0.4801	0.3699	0.1218	0.1226	0.1446	0.4801	0.3699	0.1446	0.1218	0.3773	0.1218	0.1102	0.0228	0.256	0.0129	0.016
RI.0000122	RPS26A	0.8102	0.8321	0.797	0.5556	0.6413	0.6188	0.8321	0.797	0.6413	0.5556	0.8102	0.5556	0.0351	0.0857	0.255	0.00763	0.0114
RI.0000191	ERV1	0.8235	0.9731	0.9153	0.5706	0.4719	0.5466	0.9731	0.8235	0.5706	0.4719	0.8235	0.5706	0.1496	0.0987	0.253	0.00329	0.00735
RI.0000337	RPS18A	0.3004	0.3634	0.3164	0.0481	0.0672	0.0582	0.3634	0.3004	0.0672	0.0481	0.3004	0.0481	0.063	0.0191	0.252	0.00278	0.00684
RI.0000165	RPL2B	0.3526	0.414	0.3197	0.1016	0.0981	0.0788	0.414	0.3197	0.1016	0.0788	0.3526	0.1016	0.0943	0.0228	0.251	0.00731	0.011
RI.0000091	RPL35B	0.4934	0.6116	0.5242	0.2438	0.2631	0.2393	0.6116	0.4934	0.2631	0.2393	0.4934	0.2438	0.1182	0.0238	0.25	0.0115	0.0147
RI.0000320	RRT8	0.5745	0.646	0.5993	0.3241	0.3333	0.2549	0.646	0.5745	0.3333	0.2549	0.5745	0.3241	0.0715	0.0784	0.25	0.000834	0.0038
RI.0000185	RPS18B	0.3312	0.4079	0.3167	0.0848	0.0868	0.0735	0.4079	0.3167	0.0868	0.0735	0.3312	0.0848	0.0912	0.0133	0.246	0.00961	0.0132
RI.0000234	RPL32	0.3076	0.3511	0.281	0.0629	0.0773	0.0686	0.3511	0.281	0.0773	0.0629	0.3076	0.0629	0.0701	0.0144	0.245	0.00537	0.00914
RI.0000155	RPL17A	0.3037	0.338	0.2865	0.0588	0.0669	0.0701	0.338	0.2865	0.0701	0.0588	0.3037	0.0588	0.0515	0.0113	0.245	0.00266	0.00684
RI.0000031	RPP1B	0.321	0.3826	0.3359	0.0757	0.0941	0.0818	0.3826	0.321	0.0941	0.0757	0.321	0.0757	0.0616	0.0184	0.245	0.00281	0.00684
RI.0000017	RPL25	0.2936	0.3811	0.2915	0.0511	0.0741	0.0714	0.3811	0.2915	0.0741	0.0511	0.2936	0.0511	0.0896	0.023	0.243	0.00966	0.0132
RI.0000170	YBL059W	0.9403	0.9563	0.9069	0.6978	0.7956	0.7633	0.9563	0.9069	0.7956	0.6978	0.9403	0.6978	0.0494	0.0978	0.243	0.0114	0.0147
RI.0000213	RPS23B	0.3668	0.4422	0.3585	0.1247	0.109	0.0919	0.4422	0.3585	0.1247	0.0919	0.3668	0.1247	0.0837	0.0328	0.242	0.00453	0.00835
RI.0000088	RPL31A	0.28	0.3455	0.2724	0.0404	0.0418	0.0328	0.3455	0.2724	0.0418	0.0328	0.28	0.0404	0.0731	0.009	0.24	0.00715	0.011
RI.0000087	YPR063C	0.4009	0.4763	0.4732	0.1618	0.2321	0.1996	0.4763	0.4009	0.2321	0.1618	0.4009	0.1618	0.0754	0.0703	0.239	0.00161	0.00501
RI.0000309	RPL31B	0.2655	0.4284	0.3027	0.0281	0.0391	0.0382	0.4284	0.2655	0.0391	0.0281	0.2655	0.0281	0.1629	0.011	0.237	0.0259	0.0296
RI.0000071	TAF14	0.7783	0.7967	0.8125	0.5431	0.5255	0.579	0.8125	0.7783	0.579	0.5255	0.7783	0.5431	0.0342	0.0535	0.235	0.000506	0.0031
RI.0000009	RPS25A	0.5629	0.6461	0.5397	0.3301	0.2843	0.2548	0.6461	0.5397	0.3301	0.2548	0.5629	0.3301	0.1064	0.0753	0.233	0.00276	0.00684
RI.0000269	RPL27A	0.2883	0.3115	0.2867	0.0586	0.0831	0.0608	0.3115	0.2867	0.0831	0.0586	0.2883	0.0586	0.0248	0.0245	0.23	3.45e-05	0.00101
RI.0000010	PMI40	0.3613	0.3413	0.3382	0.1319	0.1667	0.1344	0.3613	0.3382	0.1667	0.1319	0.3613	0.1319	0.0231	0.0348	0.229	0.000293	0.00287
RI.0000247	PRE3	0.7352	0.8052	0.7534	0.5071	0.4356	0.4469	0.8052	0.7352	0.5071	0.4356	0.7352	0.5071	0.07	0.0715	0.228	0.0006	0.00315
RI.0000132	MOB2	0.8275	0.8555	0.8137	0.5992	0.6587	0.6491	0.8555	0.8137	0.6587	0.5992	0.8275	0.5992	0.0418	0.0595	0.228	0.00164	0.00501
RI.0000245	RPS0A	0.2668	0.3309	0.2224	0.042	0.0459	0.0358	0.3309	0.2224	0.0459	0.0358	0.2668	0.042	0.1085	0.0101	0.225	0.0172	0.0202
RI.0000081	QCR9	0.8122	0.8877	0.77	0.5893	0.5807	0.6039	0.8877	0.77	0.6039	0.5807	0.8122	0.5893	0.1177	0.0232	0.223	0.0182	0.0212
RI.0000052	RPS16B	0.2568	0.3419	0.2762	0.0336	0.0701	0.0529	0.3419	0.2568	0.0701	0.0336	0.2568	0.0336	0.0851	0.0365	0.223	0.00521	0.00907
RI.0000322	RPS14A	0.3366	0.3884	0.3214	0.1154	0.1152	0.1031	0.3884	0.3214	0.1154	0.1031	0.3366	0.1154	0.067	0.0123	0.221	0.00564	0.00932
RI.0000137	IMD4	0.7762	0.7894	0.7678	0.5557	0.5551	0.574	0.7894	0.7678	0.574	0.5551	0.7762	0.5557	0.0216	0.0189	0.221	1.65e-05	0.000972
RI.0000227	RPS10A	0.2689	0.3256	0.2769	0.0511	0.0626	0.0434	0.3256	0.2689	0.0626	0.0434	0.2689	0.0511	0.0567	0.0192	0.218	0.00292	0.00692
RI.0000235	VPS75	0.8683	0.9123	0.8811	0.6515	0.6393	0.6158	0.9123	0.8683	0.6515	0.6158	0.8683	0.6515	0.044	0.0357	0.217	0.000154	0.00191
RI.0000231	RPL34B	0.2572	0.3276	0.2485	0.0426	0.0503	0.039	0.3276	0.2485	0.0503	0.039	0.2572	0.0426	0.0791	0.0113	0.215	0.0103	0.0138
RI.0000084	RPL30	0.3356	0.4099	0.3525	0.1206	0.158	0.1431	0.4099	0.3356	0.158	0.1206	0.3356	0.1206	0.0743	0.0374	0.215	0.00334	0.00735
RI.0000255	YOP1	0.288	0.3195	0.3025	0.0725	0.105	0.1136	0.3195	0.288	0.1136	0.0725	0.288	0.0725	0.0315	0.0411	0.215	0.000314	0.00292
RI.0000291	RPL37A	0.3994	0.4548	0.4103	0.1845	0.1945	0.193	0.4548	0.3994	0.1945	0.1845	0.3994	0.1845	0.0554	0.01	0.215	0.00426	0.00798
RI.0000290	RPS19A	0.3336	0.3859	0.3344	0.1193	0.1224	0.1199	0.3859	0.3336	0.1224	0.1193	0.3336	0.1193	0.0523	0.0031	0.214	0.00546	0.00915
RI.0000034	HMRA1	0.6385	0.6795	0.6563	0.4297	0.3839	0.3811	0.6795	0.6385	0.4297	0.3811	0.6385	0.4297	0.041	0.0486	0.209	0.000296	0.00287
RI.0000133	RPL13B	0.5546	0.5875	0.5322	0.3484	0.3972	0.3715	0.5875	0.5322	0.3972	0.3484	0.5546	0.3484	0.0553	0.0488	0.206	0.00104	0.00394
RI.0000297	ARP2	0.5949	0.618	0.582	0.3898	0.3723	0.306	0.618	0.582	0.3898	0.306	0.5949	0.3898	0.036	0.0838	0.205	0.00489	0.00879
RI.0000196	NCE101	0.8312	0.8878	0.8722	0.6259	0.6378	0.6355	0.8878	0.8312	0.6378	0.6259	0.8312	0.6259	0.0566	0.0119	0.205	0.00389	0.00775
RI.0000002	RPS0B	0.2508	0.3423	0.2773	0.0508	0.059	0.0448	0.3423	0.2508	0.059	0.0448	0.2508	0.0508	0.0915	0.0142	0.2	0.0113	0.0147
RI.0000112	MOB1	0.8273	0.777	0.6897	0.6273	0.6066	0.6094	0.8273	0.6897	0.6273	0.6066	0.8273	0.6273	0.1376	0.0207	0.2	0.0613	0.0683
RI.0000158	RAD14	0.9007	0.9295	0.9096	0.7048	0.7402	0.7083	0.9295	0.9007	0.7402	0.7048	0.9007	0.7048	0.0288	0.0354	0.196	0.000244	0.00272
RI.0000183	RPL23A	0.246	0.3189	0.2374	0.0514	0.0819	0.0535	0.3189	0.2374	0.0819	0.0514	0.246	0.0514	0.0815	0.0305	0.195	0.00846	0.0122
RI.0000323	RPS13	0.3127	0.3892	0.313	0.1177	0.1582	0.1229	0.3892	0.3127	0.1582	0.1177	0.3127	0.1177	0.0765	0.0405	0.195	0.00586	0.00961
RI.0000089	RPL33A	0.2192	0.264	0.2005	0.0295	0.0541	0.0378	0.264	0.2005	0.0541	0.0295	0.2192	0.0295	0.0635	0.0246	0.19	0.00477	0.00872
RI.0000130	RPL14A	0.2655	0.3338	0.3044	0.0774	0.0756	0.0831	0.3338	0.2655	0.0831	0.0756	0.2655	0.0774	0.0683	0.0075	0.188	0.00721	0.011
RI.0000197	RPS27A	0.8664	0.9001	0.8705	0.679	0.6259	0.6045	0.9001	0.8664	0.679	0.6045	0.8664	0.679	0.0337	0.0745	0.187	0.00264	0.00684
RI.0000228	RPL18A	0.2149	0.2678	0.2131	0.028	0.0415	0.0331	0.2678	0.2131	0.0415	0.028	0.2149	0.028	0.0547	0.0135	0.187	0.00614	0.00977
RI.0000268	RPS9B	0.257	0.3029	0.2462	0.0727	0.0944	0.0724	0.3029	0.2462	0.0944	0.0724	0.257	0.0727	0.0567	0.022	0.184	0.00336	0.00735
RI.0000117	RPL16B	0.3199	0.2826	0.314	0.1393	0.1329	0.1115	0.3199	0.2826	0.1393	0.1115	0.3199	0.1393	0.0373	0.0278	0.181	0.000407	0.0031
RI.0000289	MRM2	0.9688	1	0.9945	0.7886	0.8519	0.8639	1	0.9688	0.8639	0.7886	0.9688	0.7886	0.0312	0.0753	0.18	0.0127	0.0158
RI.0000171	RPS7A	0.2183	0.2884	0.2211	0.0379	0.0484	0.0517	0.2884	0.2183	0.0517	0.0379	0.2183	0.0379	0.0701	0.0138	0.18	0.0113	0.0147
RI.0000330	EFB1	0.274	0.3082	0.2573	0.0968	0.0986	0.097	0.3082	0.2573	0.0986	0.0968	0.274	0.0968	0.0509	0.0018	0.177	0.00662	0.0103
RI.0000131	UBC4	0.2517	0.2787	0.2388	0.0749	0.1031	0.0929	0.2787	0.2388	0.1031	0.0749	0.2517	0.0749	0.0399	0.0282	0.177	0.000576	0.00315
RI.0000179	AIM11	0.9	0.8819	0.9065	0.7253	0.7208	0.7441	0.9065	0.8819	0.7441	0.7208	0.9	0.7253	0.0246	0.0233	0.175	8.55e-05	0.00136
RI.0000184	CMC2	0.759	0.8351	0.7578	0.5847	0.625	0.6263	0.8351	0.7578	0.6263	0.5847	0.759	0.5847	0.0773	0.0416	0.174	0.00909	0.0127
RI.0000024	GLC7	0.3511	0.3744	0.3544	0.1818	0.1754	0.1845	0.3744	0.3511	0.1845	0.1754	0.3511	0.1818	0.0233	0.0091	0.169	0.000509	0.0031
RI.0000181	RPL40A	0.2504	0.2493	0.2282	0.0855	0.092	0.0815	0.2504	0.2282	0.092	0.0815	0.2504	0.0855	0.0222	0.0105	0.165	0.000528	0.0031
RI.0000102	RPL42B	0.5087	0.5208	0.5092	0.3475	0.389	0.3826	0.5208	0.5087	0.389	0.3475	0.5087	0.3475	0.0121	0.0415	0.161	0.00497	0.00887
RI.0000039	GPI15	0.9585	0.9603	0.9408	0.8	0.7459	0.7886	0.9603	0.9408	0.8	0.7459	0.9585	0.8	0.0195	0.0541	0.158	0.00411	0.0079
RI.0000019	PTC7	0.9674	0.9852	0.9767	0.8197	0.8677	0.8356	0.9852	0.9674	0.8677	0.8197	0.9674	0.8197	0.0178	0.048	0.148	0.00556	0.00925
RI.0000249	NBL1	0.9584	0.9603	0.9556	0.8127	0.7292	0.8176	0.9603	0.9556	0.8176	0.7292	0.9584	0.8127	0.0047	0.0884	0.146	0.0266	0.03
RI.0000274	YOS1	0.56	0.614	0.5109	0.4143	0.3534	0.3993	0.614	0.5109	0.4143	0.3534	0.56	0.4143	0.1031	0.0609	0.146	0.0124	0.0155
RI.0000283	YCL002C	0.983	0.991	0.957	0.844	0.7487	0.802	0.991	0.957	0.844	0.7487	0.983	0.844	0.034	0.0953	0.139	0.0142	0.0172
RI.0000061	ASC1	0.2188	0.2968	0.2386	0.0812	0.0845	0.0678	0.2968	0.2188	0.0845	0.0678	0.2188	0.0812	0.078	0.0167	0.138	0.0144	0.0174
RI.0000275	RPL23B	0.1642	0.2	0.1762	0.0259	0.0341	0.0305	0.2	0.1642	0.0341	0.0259	0.1642	0.0259	0.0358	0.0082	0.138	0.00345	0.00735
RI.0000239	SAC6	0.605	0.5644	0.5326	0.4676	0.4295	0.3877	0.605	0.5326	0.4676	0.3877	0.605	0.4676	0.0724	0.0799	0.137	0.0114	0.0147
RI.0000302	RPS6A	0.2479	0.3263	0.2995	0.1138	0.1363	0.1146	0.3263	0.2479	0.1363	0.1138	0.2479	0.1138	0.0784	0.0225	0.134	0.0117	0.0148
RI.0000100	UBC9	0.7803	0.8105	0.7695	0.647	0.6725	0.6286	0.8105	0.7695	0.6725	0.6286	0.7803	0.647	0.041	0.0439	0.133	0.00149	0.00482
RI.0000046	RPS21B	0.169	0.185	0.148	0.0402	0.0528	0.0468	0.185	0.148	0.0528	0.0402	0.169	0.0402	0.037	0.0126	0.129	0.00407	0.00789
RI.0000194	NOG2	0.29	0.3292	0.3716	0.1646	0.1583	0.1079	0.3716	0.29	0.1646	0.1079	0.29	0.1646	0.0816	0.0567	0.125	0.00406	0.00789
RI.0000001	MRPL44	0.8802	0.8786	0.879	0.7577	0.7204	0.6856	0.8802	0.8786	0.7577	0.6856	0.8802	0.7577	0.0016	0.0721	0.122	0.0169	0.0199
RI.0000267	YRA1	0.5625	0.6271	0.573	0.4583	0.3723	0.3675	0.6271	0.5625	0.4583	0.3675	0.5625	0.4583	0.0646	0.0908	0.104	0.00876	0.0124
RI.0000145	RPS30B	0.6514	0.7382	0.6937	0.5509	0.5512	0.594	0.7382	0.6514	0.594	0.5509	0.6514	0.5509	0.0868	0.0431	0.101	0.0184	0.0214
RI.0000028	STO1	0.7749	0.7842	0.7644	0.677	0.5876	0.5022	0.7842	0.7644	0.677	0.5022	0.7749	0.677	0.0198	0.1748	0.0979	0.0649	0.072
RI.0000214	ACT1	0.1853	0.2192	0.1894	0.0922	0.0746	0.0938	0.2192	0.1853	0.0938	0.0746	0.1853	0.0922	0.0339	0.0192	0.0931	0.00224	0.00632
RI.0000138	QCR10	0.5686	0.6623	0.6042	0.4845	0.5768	0.5477	0.6623	0.5686	0.5768	0.4845	0.5686	0.4845	0.0937	0.0923	0.0841	0.122	0.133
RI.0000172	CPT1	0.1913	0.3346	0.1883	0.1082	0.1338	0.135	0.3346	0.1883	0.135	0.1082	0.1913	0.1082	0.1463	0.0268	0.0831	0.141	0.153
RI.0000192	YHR097C	0.6543	0.7261	0.6407	0.5789	0.4551	0.4819	0.7261	0.6407	0.5789	0.4551	0.6543	0.5789	0.0854	0.1238	0.0754	0.026	0.0296
RI.0000140	RPL7B	0.958	0.9845	0.9323	0.8908	0.8271	0.8267	0.9845	0.9323	0.8908	0.8267	0.958	0.8908	0.0522	0.0641	0.0672	0.0168	0.0199
RI.0000242	TUB1	0.2874	0.3233	0.3026	0.2273	0.1767	0.2137	0.3233	0.2874	0.2273	0.1767	0.2874	0.2273	0.0359	0.0506	0.0601	0.00812	0.0118
RI.0000212	TUB3	0.5474	0.5122	0.5317	0.5121	0.5222	0.4949	0.5474	0.5122	0.5222	0.4949	0.5474	0.5121	0.0352	0.0273	0.0353	0.189	0.205
RI.0000062	SRC1	0.8778	0.8769	0.8777	0.8512	0.8498	0.9137	0.8778	0.8769	0.9137	0.8498	0.8778	0.8512	0.0009	0.0639	0.0266	0.806	0.852
RI.0000261	YML053C	1	0.996	1	0.9835	0.979	0.9941	1	0.996	0.9941	0.979	1	0.9835	0.004	0.0151	0.0165	0.0888	0.098
RI.0000072	RPL7B	1	1	1	0.9849	0.9894	0.9694	1	1	0.9894	0.9694	1	0.9849	0	0.02	0.0151	0.0903	0.0992
RI.0000259	MTR2	0.9982	0.9972	1	0.9878	0.9916	0.9898	1	0.9972	0.9916	0.9878	0.9982	0.9878	0.0028	0.0038	0.0104	0.00403	0.00789
RI.0000207	MTR2	1	1	1	1	1	1	1	1	1	1	1	1	0	0	0	1	1
RI.0000029	RPS22B	1	1	1	1	1	0.9992	1	1	1	0.9992	1	1	0	0.0008	0	1	1
RI.0000342	DB641776	1	1	1	1	1	1	1	1	1	1	1	1	0	0	0	1	1
RI.0000111	YBR090C	1	1	1	1	1	1	1	1	1	1	1	1	0	0	0	1	1
RI.0000150	MTR2	1	1	1	1	1	1	1	1	1	1	1	1	0	0	0	1	1
RI.0000276	MTR2	1	1	1	1	1	1	1	1	1	1	1	1	0	0	0	1	1
RI.0000057	RPL7A	1	1	1	1	0.998	0.9978	1	1	1	0.9978	1	1	0	0.0022	0	1	1
RI.0000121	NYV1	1	1	1	1	1	1	1	1	1	1	1	1	0	0	0	1	1
RI.0000260	RPL26B	1	1	1	1	1	1	1	1	1	1	1	1	0	0	0	1	1
RI.0000325	NYV1	1	1	1	1	1	0.9966	1	1	1	0.9966	1	1	0	0.0034	0	1	1
RI.0000036	SRC1	1	0.9983	0.9978	1	1	1	1	0.9978	1	1	1	1	0.0022	0	0	1	1
RI.0000321	BMH2	1	1	1	1	1	1	1	1	1	1	1	1	0	0	0	1	1
RI.0000063	YBR090C	0.9986	0.9989	0.9986	1	0.9988	0.9989	0.9989	0.9986	1	0.9988	0.9986	1	0.0003	0.0012	-0.0014	0.298	0.321
RI.0000129	RPS29A	0.9947	0.9969	0.9974	1	0.976	1	0.9974	0.9947	1	0.976	0.9947	1	0.0027	0.024	-0.0053	0.643	0.689
RI.0000281	REC107	0.9692	1	0.9936	0.9905	0.9856	1	1	0.9692	1	0.9856	0.9692	0.9905	0.0308	0.0144	-0.0213	0.698	0.745
RI.0000045	HAC1	0.9643	0.975	0.975	0.9914	0.9876	0.9941	0.975	0.9643	0.9941	0.9876	0.9643	0.9914	0.0107	0.0065	-0.0271	0.0162	0.0193
RI.0000054	RPL7A	0.7505	0.8223	0.7342	0.7981	0.8193	0.7294	0.8223	0.7342	0.8193	0.7294	0.7505	0.7981	0.0881	0.0899	-0.0476	0.747	0.793
