# Supplementary material
Source: HighWire-hosted journal article supplement (doi:10.1101/rna.079917.123)
Supplement: Supplemental_Table_4.xlsx [file Supplemental_Table_4.xlsx]

## Sheet: Mitochondria-related
Gene	log2-fold Change (Luc7D-I/UI)	Function
Electron transport and OXPHOS
COX3	-1.51187	Subunit III of cytochrome c oxidase (Complex IV) encoded in mt-genome
COX26	-1.44513	Subunit of cytochrome C oxidase complex (complex III)
COX4	-0.823081	Subunit IV of cytochrome c oxidase
COX10	-0.689115	Converts protoheme to heme A, prosthetic group required for cytochrome c oxidase activity
QCR9	-0.585098	Subunit 9 of ubiquinol cytochrome-c reductase (Complex III)
COX11	-0.57298	Required for delivery of Cu to Cox1; involved in oxidative stress response;
COX18	-0.561002	Subunit VIII of cytochrome c oxidase (Complex IV)
COX19	-0.354679	Required for cytochrome c oxidase assembly
COX15	-0.242468	Heme a synthase; required for the hydroxylation of heme O to form heme A
COX5B	-0.18	Subunit Vb of cytochrome c oxidase
Heme biosynthesis (localized in mitochondria and nucleo-cytoplasm)
HEM13	-1.61934	O2-requiring cytosolic Coproporphyrinogen III oxidase, catalyzes sixth step in heme biosynthesis
HEM25	-0.604916	Mitochondrial glycine transporter required for the initiation of heme biosynthesis
HEM3	-0.555359	Converts 4-porphobilinogen to hydroxymethylbilane, the third step in heme biosynthesis
HEM1	-0.488082	Mitochondrial 5-aminolevulinate synthase, catalyzes the first step in the heme biosynthesis
HEM15	-0.472949	Mitochondrial ferrochelatase, inserts Fe2+ into protoporphyrin IX; last step of heme biosynthesis
HEM12	-0.372272	Uroporphyrinogen decarboxylase; catalyzes the 5th step in the heme biosynthesis
HEM4	-0.338032	Uroporphyrinogen III synthase, catalyzes the 4th step in the heme biosynthesis
HEM2	-0.121685	Aminolevulinate dehydratase, catalyzes the 2nd step in the heme biosynthesis
RNA processing
SEN34	-0.614791	Subunit of the mitochondrial tRNA splicing endonuclease complex
MRS1	-0.607563	Required for splicing of two mitochondrial group I introns (BI3 in COB and AI5β in COX1)
SEN2	-0.574145	Subunit of the mitochondrial tRNA splicing endonuclease complex
SEN15	-0.337542	Subunit of the mitochondrial tRNA splicing endonuclease complex
MRS2	-0.321725	Mg2+ channel, supports splicing of group II introns by Mg2+ supply
MSS18	-0.254693	Needed for splicing of mitochondrial COX1 aI5β intron
MSS116	-0.187856	Mitochondrial transcription elongation factor, required for efficient splicing of mitochondrial Group I and II introns
DNA replication, transcription, translation and protein folding
RIM1	-0.975498	SSB needed for mt-genome maintenance
RIM2	-0.372119	Mitochondrial pyrimidine nucleotide transporter
SUV3	-0.286828	ATP-dependent RNA helicase involved in mt-DNA replication and mRNA turnover/processing
RSM26	-0.554701	mt-ribosomal protein
RSM23	-0.437613	mt-ribosomal protein
RSM28	-0.35546	mt-ribosomal protein
RSM25	-0.164632	mt-ribosomal protein
RSM19	0.563165	mt-ribosomal protein
RSM7	0.425506	mt-ribosomal protein
RSM27	0.236183	mt-ribosomal protein
RSM22	0.168249	mt-ribosomal protein
RSM18	0.159616	mt-ribosomal protein
MSM1	-0.511804	Mitochondrial methionyl-tRNA synthetase involved in mitochondrial protein synthesis
HSP78	2.8301	Mitochondrial matrix chaperone, prevents the aggregation of misfolded proteins
HSP60	0.6736	Required for folding of mitochondrial precursor polypeptides and complex assembly

## Sheet: Iron Homeostasis
Gene	log2-fold Change (Luc7D-I/UI)	Function
SMF3	0.68	Iron exporter involved in iron homeostasis
NFS1	0.17	Cysteine desulfurase, predominantly mitochondrial; part of iron regulon and required for thio-modification of mitochondrial and cytoplasmic tRNAs;
MRS3	-0.562505	Member of the mitochondrial carrier family (MCF), implicated in mitochondrial Fe(2+) homeostasis.
LSO1	3.75578	Responds to Fe-status; localizes to cytoplasm under Fe-deprivation and nucleus in Fe-repletion
NBP35	0.883912	Part of iron regulon; Essential cytoplasmic iron-sulfur cluster binding protein
CFD1	0.242494	Part of iron regulon
ATM1	-0.509453	Mitochondrial inner membrane ABC-transporter; exports Fe/S cluster precursors to the cytosol
MSN4	-0.882003	Transcription factors (TFs) that induce vacuolar metal importer Ccc1 under excessive iron
MSN2	-0.183582
CCC1	-0.436939	Vacuolar metal importer activated only under excessive iron
GRX4	-0.494886	Binds and transfers the mitochondrial Fe-signal to transcription factors (Aft1-Aft2), limiting their activity
Yap5	-0.238912	Transcriptional activator of CCC1 and GRX4, in response to high iron
TYW1	-0.773961	A cytosolic Fe/S-enzyme implicated in iron buffering; induced by Yap5 under excess iron
Aft1	-0.263033	TFs inducing 20 genes collectively named 'the iron regulon
Aft2	-0.115265
FET3	0.480354	Part of copper-dependent high-affinity iron importer complex of the PM, part of iron regulon
FTR1	0.576416
CCC2	1.29996	copper-delivery proteins needed for FET3 and FTR1 function
FET4	-1.64961	O2-independent low-affinity plasma membrane iron and copper transporter, part of iron regulon
FET5	0.347332	Paralog of FRT3; iron exporter, part of iron regulon under the control of Aft1
ARN1	0.404469	iron-xenosiderophore-specific transporters
ARN2	-0.29334
HMX1	0.521716	heme oxygenase involved in iron recycling by heme degradation, part of iron regulon
